# Supplementary material for: Transcriptome Analyses Show Changes in Gene Expression Triggered by a 31-bp InDel within OsSUT3 5′UTR in Rice Panicle
Source: Int J Mol Sci. 2023 Jun 26;24(13):10640. doi: 10.3390/ijms241310640 (PMC10341534; doi:10.3390/ijms241310640)
Supplement: Supplementary file 1 [file ijms-24-10640-s001.zip]

Archive with 5 entries (5 files):
- Figure S1, S2, S3.pdf
- Table S1. ALL DEGs.xlsx
- Table S2. 44 subclasses enriched by GO.xlsx
- Table S3. Top 22 secondary items enriched by GO.xlsx
- Table S4. Primer sequences used in this study.xlsx
