# Supplementary material for: Transcriptome Analyses Show Changes in Gene Expression Triggered by a 31-bp InDel within OsSUT3 5′UTR in Rice Panicle
Source: Int J Mol Sci. 2023 Jun 26;24(13):10640. doi: 10.3390/ijms241310640 (PMC10341534; doi:10.3390/ijms241310640)
Supplement: Supplementary file 1 [file ijms-24-10640-s001.zip › Table S1. ALL DEGs.xlsx]

## Sheet: Sheet1
Table S1. ALL DEGs.
Serial number	gene id	gene name	In-1_FPKM	In-2_FPKM	In-3_FPKM	De-1_FPKM	De-2_FPKM	De-3_FPKM	DESeq2_FDR	DESeq2_log2FC	In vs Del
1	Os03g0568000	--	2.31545	2.34634	1.84995	0.845874	0.755677	0.811493	0.000141429	-1.38555	down
2	Os01g0974701	LOC_Os01g74340;	2.47262	3.20632	3.40601	5.63062	6.68789	6.4309	0.00337212	1.07339	up
3	Os05g0243200	LOC_Os05g15360;	8.97192	9.84683	9.41714	5.1937	7.78941	7.10294	0.00871379	-0.620716	down
4	Os06g0629362	--	0.959871	1.30527	1.41727	0.517668	0.363408	0.370749	5.45051e-06	-1.50931	down
5	Os12g0157000	LOC_Os12g06080;	14.9863	8.15539	11.392	32.8103	16.7997	22.0655	0.00091777	1.10072	up
6	Os08g0440100	LOC_Os08g34150;	12.0548	10.5759	9.23934	15.0254	17.8343	18.1346	0.00105659	0.706002	up
7	Os03g0279816	LOC_Os03g17164;	11.6091	9.64601	13.7659	19.7701	22.1193	20.8358	0.00236667	0.869305	up
8	Os03g0392250	--	9.05804	8.21565	8.52456	4.39652	5.8597	5.89292	0.000184398	-0.649759	down
9	Os03g0859700	LOC_Os03g64210;	20.7306	29.1727	21.3812	8.86865	15.4325	10.3373	0.000418433	-1.02021	down
10	Os04g0395700	LOC_Os04g32470;	10.9089	10.4619	10.3929	21.9489	17.2764	17.4783	2.91879e-05	0.873401	up
11	Os05g0455900	LOC_Os05g38190;	2.71197	2.66559	2.31043	1.109	1.60914	1.79378	0.00723002	-0.743869	down
12	Oryza_sativa_newGene_3045	--	1.51649	1.86856	2.03396	0.644164	0.860743	0.710687	0.00648966	-1.25423	down
13	Oryza_sativa_newGene_6671	--	2.54684	2.58194	2.06135	0.704267	0.908683	1.07089	1.5408e-05	-1.39138	down
14	Os07g0505300	--	1.82005	1.64402	1.86227	2.57435	4.38895	4.36264	0.00178026	1.10554	up
15	Os07g0248900	LOC_Os07g14514;	4.01131	5.22791	4.36227	2.25899	2.86368	2.25153	0.00018747	-0.855546	down
16	Os11g0547000	LOC_Os11g34460;	35.5099	29.8829	29.7104	14.1262	21.9321	17.5591	6.50026e-10	-0.804797	down
17	Os03g0853600	LOC_Os03g63660;	6.37911	6.93019	6.95918	9.05453	10.1779	10.7121	0.000750215	0.590861	up
18	Os05g0397800	LOC_Os05g33010;	4.58223	4.08612	3.89592	8.92612	5.85293	7.43215	0.00627288	0.863737	up
19	Oryza_sativa_newGene_8141	--	0.862004	1.31894	1.83717	0.53889	0.557411	0.496483	0.00065674	-1.29088	down
20	Os05g0419800	LOC_Os05g34700;	54.1626	42.1799	38.8705	74.4867	87.6524	66.3036	8.25435e-06	0.786744	up
21	Os02g0313500	LOC_Os02g20940,LOC_Os02g20950;	22.7982	22.2341	20.5604	12.1692	15.8846	14.6143	1.29859e-05	-0.593586	down
22	Os02g0749000	LOC_Os02g51390;	11.3274	10.5363	10.7159	5.48224	8.68912	6.78354	0.0017201	-0.613665	down
23	Os01g0709750	--	3.8163	3.21623	3.59932	0.927333	1.99322	2.30565	0.00575154	-1.00635	down
24	Os01g0953500	LOC_Os01g72420;	16.7087	14.6613	16.2077	30.9876	19.4921	27.012	0.00128573	0.744143	up
25	Oryza_sativa_newGene_7582	--	3.23303	5.70273	5.41905	10.4039	7.16199	11.6762	0.0070263	1.05999	up
26	Os07g0136800	LOC_Os07g04380,LOC_Os07g04390,LOC_Os07g04410,LOC_Os07g04420;	7.90611	9.90883	7.86488	2.54733	4.67334	4.4597	1.17899e-05	-1.14262	down
27	Os02g0202000	LOC_Os02g10760;	6.29634	5.26434	2.44244	0.884556	1.05591	0.860821	8.43376e-06	-2.26407	down
28	Oryza_sativa_newGene_6257	--	21.7016	25.3113	20.3269	10.339	9.62449	5.8148	1.46858e-16	-1.49798	down
29	Os09g0536700	LOC_Os09g36600;	12.3908	14.7286	12.3903	9.48541	7.8869	9.64157	0.000866441	-0.627618	down
30	Os05g0165900	LOC_Os05g07300;	7.18502	7.27937	4.90415	2.64248	4.6055	3.50652	0.00380419	-0.826557	down
31	Os03g0574300	LOC_Os03g37780;	5.53064	6.24092	5.7758	2.89938	3.10292	2.80321	1.08016e-08	-0.964004	down
32	Os06g0731750	--	3.64085	3.28592	5.35258	9.24788	6.1504	8.23827	0.00694425	0.982454	up
33	Os11g0629550	--	3.03991	3.64969	3.1924	0.653896	1.95964	0.738623	0.00053762	-1.54561	down
34	Os02g0712800	LOC_Os02g48220;	5.29949	4.9033	5.15873	1.9133	2.75378	2.14563	4.99546e-08	-1.14699	down
35	Os08g0484700	LOC_Os08g37810;	10.1821	7.24113	8.82052	12.3448	13.1733	13.0895	0.00513037	0.588807	up
36	Os11g0115400	LOC_Os11g02389;	71.4686	83.842	76.1612	172.924	126.127	105.653	0.000133527	0.844249	up
37	Os07g0264000	LOC_Os07g16030;	16.2895	17.7878	17.4923	9.10131	12.0478	7.98608	3.49091e-06	-0.814233	down
38	Oryza_sativa_newGene_6821	--	7.1242	6.64074	8.27624	3.76225	3.84065	3.98719	1.61747e-07	-0.893378	down
39	Os01g0602400	LOC_Os01g41810;	0.459469	0.080899	0.086429	1.06318	0.617419	1.68054	0.00513037	2.40586	up
40	Os11g0526200	LOC_Os11g32320;	15.1824	14.3739	15.146	25.6002	22.4727	26.4106	1.85488e-05	0.770578	up
41	Os06g0704800	LOC_Os06g49130;	3.35107	3.3342	3.40067	1.60665	2.40319	2.22414	0.00337212	-0.671835	down
42	Os11g0220100	--	3.0168	3.26483	3.18203	1.53432	1.6332	1.13875	1.09e-05	-1.10265	down
43	Os04g0349700	LOC_Os04g28210;	4.8907	4.48896	4.30293	2.04901	2.84485	2.6128	6.62563e-05	-0.84101	down
44	Os01g0850900	LOC_Os01g63210;	0.906722	2.87918	1.43226	4.79599	5.36358	6.30544	0.00065674	1.67199	up
45	Os12g0539700	LOC_Os12g35460;	10.0745	10.247	9.15595	4.56803	7.34347	6.99229	0.0018523	-0.653556	down
46	Os02g0617500	LOC_Os02g40450;	3.3539	3.19608	2.78657	1.35696	2.05562	0.890054	0.00532254	-1.08665	down
47	Os09g0315200	LOC_Os09g14614;	12.6498	15.1515	16.7851	6.6369	10.0842	9.78035	0.00250146	-0.728397	down
48	Os04g0474500	LOC_Os04g39840;	8.38122	11.3591	8.02024	3.0683	5.12166	6.68766	0.00799512	-0.863102	down
49	Oryza_sativa_newGene_2439	--	5.37935	5.17987	5.66121	2.84586	3.53079	3.83832	0.000256218	-0.664777	down
50	Os01g0327500	LOC_Os01g22380;	12.5059	6.73156	7.34395	19.4368	16.0615	15.7262	0.00235375	0.984732	up
51	Os11g0150100	LOC_Os11g05260;	6.72005	8.19434	7.71004	3.63292	4.55521	3.69498	4.8125e-05	-0.900375	down
52	Os06g0724800	LOC_Os06g50900;	26.0485	19.688	15.2091	28.504	35.0371	33.5592	0.00216609	0.701157	up
53	Os01g0737550	--	3.77892	4.85873	4.13804	1.50629	1.97914	1.33603	0.00153687	-1.36521	down
54	Os01g0547000	LOC_Os01g36640;	20.9036	23.4137	20.5588	11.1931	14.9359	13.8154	3.26263e-06	-0.673835	down
55	Os12g0181500	LOC_Os12g08090;	6.51818	14.1262	9.41094	4.98354	5.69527	5.29244	0.00696851	-0.885965	down
56	Oryza_sativa_newGene_7783	--	2.07972	2.45031	1.70962	0.648033	0.741674	1.01417	0.00102825	-1.33919	down
57	Os10g0466800	LOC_Os10g32930;	11.6738	5.99642	8.74504	18.3394	14.0311	14.1099	0.00877853	0.85472	up
58	Os12g0204500	LOC_Os12g10320;	10.2992	8.47765	11.2334	16.515	14.6583	13.2475	0.00593851	0.601569	up
59	Oryza_sativa_newGene_2315	--	8.66483	8.84629	10.2039	5.28712	5.27133	5.02805	0.000225776	-0.912448	down
60	Os02g0649900	LOC_Os02g43370;	4.01801	3.90532	4.06217	1.48597	2.5811	2.33515	0.00360818	-0.883498	down
61	Oryza_sativa_newGene_6063	--	0.794784	1.46808	1.65506	0.546922	0.721087	0.444013	0.00888107	-1.16335	down
62	Os06g0122500	--	5.47248	6.91172	4.84249	2.56694	2.78099	2.262	0.000750824	-1.14779	down
63	Os03g0336400	LOC_Os03g21820;	4.03014	4.96068	4.26992	7.13719	8.45076	8.11545	0.000689115	0.860186	up
64	Os12g0265400	LOC_Os12g16480;	18.9179	17.3981	18.6016	11.4932	12.2745	8.76744	0.00206318	-0.722083	down
65	Os09g0405300	--	34.587	53.7696	65.6837	34.4596	26.0914	19.9992	0.00447841	-0.897148	down
66	Os04g0587500	LOC_Os04g49757;	1.01198	0.887369	1.19834	0.219789	0.047714	0.030805	9.06291e-05	-3.25019	down
67	Os02g0752701	--	53.2835	68.7874	75.7229	19.7039	40.7719	37.0354	0.000106653	-1.00249	down
68	Os04g0379933	--	4.53873	5.58286	4.40648	1.86139	2.95679	2.17492	0.000312888	-1.03217	down
69	Oryza_sativa_newGene_9085	--	3.49066	4.64165	4.52267	2.63629	2.93302	1.7455	0.00514176	-0.779601	down
70	Os02g0187000	LOC_Os02g09410;	18.5354	19.7597	18.7161	24.6807	25.1356	34.8808	0.00447841	0.600628	up
71	Os10g0118000	LOC_Os10g02840;	0.533969	0.506005	0.551296	1.35891	1.31089	1.99902	0.00370629	1.56481	up
72	Os12g0291066	--	17.9424	23.3543	26.7587	12.7851	11.6622	10.2687	6.882e-05	-0.935784	down
73	Oryza_sativa_newGene_6209	--	2.61512	3.14286	2.93824	1.27416	1.57877	1.82962	0.000504849	-0.866907	down
74	Os01g0660200	LOC_Os01g47070;	0.144117	0.096272	0.427601	0.846924	1.33586	1.04614	0.00558911	2.24439	up
75	Os11g0116200	LOC_Os11g02424;	815.285	1550.84	1026.37	483.147	356.488	530.649	0.00404918	-1.27242	down
76	Os12g0532600	LOC_Os12g34802;	32.9311	30.3918	34.7393	21.3022	21.77	16.9942	0.000146678	-0.674667	down
77	Os02g0708500	LOC_Os02g47890;	3.51947	5.52751	4.48607	1.51972	1.93186	0.996163	1.23984e-05	-1.56878	down
78	Os11g0549401	--	25.5898	25.0054	28.116	10.5313	12.6897	13.3143	7.66834e-05	-1.07451	down
79	Os12g0456100	LOC_Os12g27060;	3.8862	4.42776	3.12161	1.8056	2.18027	1.59893	7.82986e-05	-1.00326	down
80	Os05g0399400	LOC_Os05g33140;	87.992	83.6469	99.8588	148.041	138.008	114.096	0.00038269	0.5934	up
81	Os02g0567850	--	6.31003	8.10223	7.21838	3.29928	5.65035	4.31785	0.00488666	-0.68467	down
82	Os12g0111800	LOC_Os12g02060;	2.58461	4.4453	2.69524	1.3544	1.22472	1.6005	0.00894053	-1.18463	down
83	Os09g0527900	LOC_Os09g35880;	33.1082	34.2965	42.0468	76.7633	76.8168	84.4806	2.06384e-20	1.17345	up
84	Os03g0109900	LOC_Os03g01940;	38.6809	31.5471	35.2884	18.7214	22.7953	22.0694	3.63386e-08	-0.703137	down
85	Os05g0550200	--	4.87054	4.83863	5.03934	2.56966	3.2873	3.01536	5.29622e-05	-0.707221	down
86	Os06g0700700	LOC_Os06g48720;	7.64468	11.1898	7.10331	3.38829	4.63767	3.70378	2.98447e-05	-1.11972	down
87	Os11g0131800	LOC_Os11g03720;	9.42987	10.0712	10.2941	5.76727	7.83	5.60139	0.000805278	-0.608465	down
88	Oryza_sativa_newGene_7887	--	3.89687	4.22064	4.94506	2.48508	2.97346	2.07187	4.63735e-05	-0.948965	down
89	Os02g0744900	LOC_Os02g51080;	20.9493	31.4106	27.0177	44.1898	43.651	51.5059	1.02647e-05	0.84157	up
90	Os06g0587200	LOC_Os06g38760;	2.05505	3.07503	2.22282	1.32578	1.39684	1.03161	0.00282794	-0.938844	down
91	Os01g0889400	LOC_Os01g66590;	12.4304	8.60152	10.1029	15.7444	17.4978	14.975	0.00179901	0.651777	up
92	Os08g0469700	LOC_Os08g36590;	11.6745	9.98598	10.8803	19.7048	16.2971	13.74	0.00427291	0.649784	up
93	Os02g0801300	LOC_Os02g55770;	24.8747	20.7807	24.2149	11.6462	15.7396	13.4376	5.52647e-05	-0.676962	down
94	Os06g0728700	LOC_Os06g51260;	3.90769	6.45325	10.4685	22.7772	20.394	33.4809	0.00114836	1.90957	up
95	Os02g0247000	LOC_Os02g14900;	3.36802	3.81225	2.81224	1.40902	1.10408	1.98693	0.00124923	-1.11494	down
96	Os12g0569200	LOC_Os12g38140;	4.0124	2.55662	2.88046	9.07617	5.4857	5.57212	0.00664797	1.13029	up
97	Os12g0128700	LOC_Os12g03470;	24.5847	23.5902	26.2444	37.4736	34.0906	40.0018	1.24614e-05	0.61756	up
98	Os01g0238200	LOC_Os01g13660;	65.1322	51.8602	57.3832	97.7001	87.409	83.5376	6.07977e-05	0.659068	up
99	Oryza_sativa_newGene_8838	--	2.25673	2.67355	2.66971	1.48679	1.54358	1.16461	2.92245e-06	-1.23861	down
100	Os07g0684400	LOC_Os07g48520;	6.47609	5.54614	6.46627	3.35828	4.55456	3.40544	0.000992059	-0.643197	down
101	Os12g0405400	--	29.8168	28.3049	30.7107	16.0865	19.6447	15.8713	8.73826e-09	-0.754508	down
102	Os07g0520800	LOC_Os07g33660;	11.4143	9.75114	9.39117	14.9855	15.5024	17.3117	0.00161161	0.67652	up
103	Os10g0506200	LOC_Os10g36210;	4.4515	4.39341	4.75144	2.16747	2.80725	2.55877	3.43815e-05	-0.822693	down
104	Os01g0695700	LOC_Os01g50070,LOC_Os01g50080;	2.3604	3.53221	6.4794	1.7436	2.26231	1.92202	0.00865757	-1.03439	down
105	Os01g0846700	--	1.4409	1.90459	2.57363	3.30031	4.17351	5.85483	0.000969591	1.19746	up
106	Os02g0131050	--	6.30578	7.54317	5.95894	2.99818	4.48603	3.89685	0.000145694	-0.775762	down
107	Os05g0151300	LOC_Os05g05940;	8.79122	9.80822	10.1903	15.7963	13.1252	15.7399	0.00167065	0.667091	up
108	Os03g0591000	LOC_Os03g39407;	9.73649	9.46623	7.60474	4.70419	5.7164	4.02317	0.000534187	-0.753281	down
109	Os02g0828500	LOC_Os02g58170;	15.2124	25.7511	15.9249	6.89368	8.36799	10.2942	3.70955e-05	-1.12931	down
110	Os02g0466400	LOC_Os02g26720;	1.06133	1.26308	1.35333	3.71624	1.98235	4.63996	0.000862989	1.52788	up
111	Os12g0132000	LOC_Os12g03800;	14.8105	11.8262	13.0132	20.6246	18.7906	21.2516	0.00113131	0.647629	up
112	Os08g0489300	LOC_Os08g38170;	0.094965	0.383783	0.645309	0.73484	2.43332	1.23093	0.00772599	1.97129	up
113	Os06g0255200	LOC_Os06g14406;	2.74065	5.27391	2.29283	0.580315	1.94081	0.856002	0.00449215	-1.59424	down
114	Os09g0549425	--	1.37933	1.77051	1.23025	0.41044	0.705861	0.504986	0.00332598	-1.4155	down
115	Os09g0498000	LOC_Os09g32270;	9.23965	10.1593	10.5672	5.37874	7.21014	5.69441	2.08659e-05	-0.686965	down
116	Os05g0386700	--	25.1294	30.8987	25.5258	10.3489	13.7843	18.8593	3.05537e-05	-0.908696	down
117	Oryza_sativa_newGene_1492	--	16.8742	19.4646	15.5652	11.3758	12.7385	7.87221	0.00703084	-0.667274	down
118	Os11g0305300	--	11.5187	15.6604	15.3033	5.93058	8.41378	6.90625	6.23152e-05	-0.975876	down
119	Os05g0446600	LOC_Os05g37410;	4.88937	7.20213	4.44136	1.75358	3.03825	2.12392	8.87682e-05	-1.23502	down
120	Os02g0805100	LOC_Os02g56120;	1.8182	3.07086	2.76728	6.22826	4.57986	5.57116	0.00259392	1.12786	up
121	Os10g0394400	LOC_Os10g25487;	17.5547	15.2919	15.5088	8.54788	12.1103	9.91042	6.71915e-05	-0.635911	down
122	Os03g0586400	LOC_Os03g38940;	6.45619	6.17094	6.41131	3.40518	4.01652	3.15924	1.14103e-05	-0.817774	down
123	Os08g0265000	--	12.7707	13.9872	11.9713	6.26108	9.37604	7.61582	0.000171055	-0.712683	down
124	Os07g0297400	LOC_Os07g20164;	34.6586	28.455	34.9031	47.2937	54.7502	57.5357	2.40875e-07	0.732641	up
125	Oryza_sativa_newGene_1295	--	3.1816	5.16333	3.44782	0.704022	1.4286	1.36172	2.73892e-09	-1.7423	down
126	Os05g0399700	LOC_Os05g33150;	2134.35	1752.93	2204.21	4977.55	3690.32	3707.14	5.41018e-10	1.06125	up
127	Oryza_sativa_newGene_3753	--	0.565127	0.286791	0.394636	3.2497	3.3852	1.62634	1.74498e-06	2.61602	up
128	Os02g0478900	LOC_Os02g27790;	1.38545	1.89911	1.90667	0.474736	0.989031	0.4269	0.00143025	-1.43675	down
129	Oryza_sativa_newGene_8755	--	3.87616	2.74475	2.90125	0.357718	0.539717	1.85513	0.00326199	-1.74212	down
130	Os04g0668200	LOC_Os04g57250,LOC_Os04g57260;	8.50054	13.4819	17.0092	7.23717	5.07343	4.50704	8.13945e-05	-1.17384	down
131	Os06g0701400	LOC_Os06g48780;	43.0748	48.2946	33.5979	72.182	55.2745	62.5352	0.00459388	0.640974	up
132	Os02g0635300	--	10.4457	10.1027	7.88896	4.1751	5.18433	4.27231	0.00717793	-1.03075	down
133	Os01g0570800	LOC_Os01g38980;	1.20219	3.06507	3.50846	0.792672	0.782822	0.684066	0.00027956	-1.74904	down
134	Os04g0269900	LOC_Os04g20210;	10.1396	11.9949	11.2073	5.53533	7.25197	5.35003	1.08068e-07	-0.852246	down
135	Os03g0259400	LOC_Os03g15360;	4.04763	3.27758	3.38114	1.65098	2.12076	1.38408	0.00799522	-1.01778	down
136	Os08g0475500	LOC_Os08g37070;	30.58	33.659	20.6097	12.4715	11.7816	17.4783	0.00128212	-0.990089	down
137	Oryza_sativa_newGene_4231	--	5.12374	4.94972	4.15414	6.81536	7.01072	8.33711	0.00318638	0.674489	up
138	Os03g0308800	LOC_Os03g19560;	11.4523	14.8599	15.1457	23.5425	26.2149	34.0114	2.76456e-07	0.992822	up
139	Oryza_sativa_newGene_1776	--	2.93568	1.8801	1.24581	0	0.525003	0.054609	0.0025398	-3.35821	down
140	Os04g0446750	--	4.87642	5.04628	4.75976	2.17504	2.29853	2.57965	2.73892e-09	-1.0269	down
141	Os07g0685000	LOC_Os07g48570;	8.85342	11.2195	11.1267	16.5264	14.6127	22.0375	0.00049348	0.801216	up
142	Os03g0722400	LOC_Os03g51230;	22.7212	17.2658	21.9807	33.3479	35.1781	33.1074	4.13766e-05	0.744957	up
143	Os01g0627400	LOC_Os01g43700;	17.5796	26.7531	24.536	10.9632	14.9155	12.282	0.000139026	-0.827543	down
144	Os01g0924200	LOC_Os01g69960;	17.1567	15.8619	22.1324	32.0921	24.405	30.6288	0.00241952	0.696071	up
145	Os02g0798900	LOC_Os02g55550;	7.35985	8.90752	8.25524	4.46965	5.69904	4.78306	0.00648854	-0.688137	down
146	Os11g0147150	--	8.26955	6.24519	10.7697	19.7108	11.54	17.9607	0.00316573	1.00321	up
147	Os05g0589200	LOC_Os05g51150;	17.0006	12.6737	12.8101	7.02439	9.5358	6.36245	0.000311955	-0.861256	down
148	Oryza_sativa_newGene_9283	--	5.39482	6.39961	6.09751	2.68366	4.51213	2.67161	6.91635e-07	-0.973063	down
149	Os08g0159900	LOC_Os08g06344;	39.5031	44.2318	39.18	28.2373	32.9666	28.2633	3.60965e-05	-0.595862	down
150	Os01g0844500	LOC_Os01g62630;	8.72302	7.96027	8.97311	14.9569	13.9347	10.8173	0.00281683	0.665201	up
151	Os04g0520700	LOC_Os04g43990;	6.36003	6.12341	5.89628	13.7142	10.2865	11.3129	2.5165e-05	0.979116	up
152	Os06g0648200	--	17.719	14.8408	13.5956	10.1402	14.2149	8.02575	0.000437159	-0.755839	down
153	Os02g0695600	LOC_Os02g46830;	7.79426	9.03991	6.80472	10.7797	16.9049	12.0639	0.00928809	0.770193	up
154	Os09g0433800	LOC_Os09g26370;	29.835	24.6056	34.0761	58.9971	65.7211	53.7786	3.12347e-10	1.04236	up
155	Oryza_sativa_newGene_9511	--	17.8138	16.1539	16.3395	10.3431	11.0278	9.24841	8.19618e-09	-0.721178	down
156	Os04g0661700	LOC_Os04g56630;	25.1605	25.6889	24.0514	12.3702	19.2746	16.5571	0.000565709	-0.612517	down
157	Os04g0479700	LOC_Os04g40340;	9.34993	9.5054	10.3106	5.57939	6.3512	5.40796	9.56363e-07	-0.720834	down
158	Oryza_sativa_newGene_2144	--	7.72278	6.37194	4.18464	0.475502	0.897291	0.337839	9.55887e-14	-3.24611	down
159	Os07g0534300	--	3.00582	3.81188	3.50421	0.477925	1.06781	1.2112	1.06134e-06	-1.88928	down
160	Oryza_sativa_newGene_6705	--	3.09944	5.36677	5.68787	2.14095	2.53694	2.41456	0.000399856	-0.970935	down
161	Os11g0224600	LOC_Os11g11730;	69.1592	95.4718	125.376	65.6284	52.4501	45.1562	0.00209146	-0.793317	down
162	Oryza_sativa_newGene_8450	--	3.14187	2.72358	3.13657	1.92629	1.33332	1.91269	0.005669	-0.892074	down
163	Os01g0148000	LOC_Os01g05500;	6.90052	12.2118	6.78607	1.82374	4.51309	3.82659	0.000314484	-1.33594	down
164	Os08g0323800	--	2.3375	3.28305	2.69202	0.713423	1.29588	0.91618	0.00639205	-1.46855	down
165	Os01g0725800	LOC_Os01g52640;	7.24829	9.08677	7.67543	11.5691	13.2913	13.7704	1.24614e-05	0.713778	up
166	Os11g0631825	LOC_Os11g41365;	0.785439	1.21181	0.86429	0.427511	0.451686	0.377726	0.00653438	-1.14297	down
167	Os10g0468500	LOC_Os10g33040;	2.04287	2.3352	1.99122	2.97657	3.78296	3.0373	0.00326199	0.652309	up
168	Os02g0579000	LOC_Os02g36880;	3.12574	2.75589	2.84593	1.43705	1.61954	0.901869	0.00794888	-1.10249	down
169	Oryza_sativa_newGene_1450	--	7.8423	7.89007	8.49709	4.54269	4.65924	5.18383	0.00504242	-0.598454	down
170	Oryza_sativa_newGene_7911	--	7.20354	7.71273	8.50373	4.69141	4.09666	5.06331	0.00228329	-0.723822	down
171	Os04g0543600	LOC_Os04g45950;	7.06014	4.72207	7.094	1.08973	0.381984	1.12956	2.20077e-13	-2.79827	down
172	Os07g0489500	LOC_Os07g30640;	293.769	380.414	349.583	154.679	228.807	254.317	0.00145787	-0.65931	down
173	Os02g0665000	LOC_Os02g44550;	23.18	25.8259	25.7591	14.9797	17.1476	14.9922	1.46203e-06	-0.629788	down
174	Os06g0194400	LOC_Os06g09420;	4.7175	4.60142	4.30681	9.02988	8.08892	6.64012	0.00236667	0.836246	up
175	Os06g0602500	LOC_Os06g40030;	6.08298	6.60558	6.02952	2.60723	4.43047	3.73099	0.0014327	-0.776623	down
176	Os07g0593332	LOC_Os07g40320;	6.23891	6.62192	5.01859	12.7298	12.263	11.5575	0.000465167	1.05959	up
177	Os03g0750000	LOC_Os03g53900;	13.6093	13.9241	14.8175	22.8101	17.1044	27.4874	0.00419917	0.705939	up
178	Os02g0618100	LOC_Os02g40500;	7.79313	8.77077	7.52927	4.51767	2.95227	2.07759	0.00300619	-1.28325	down
179	Os08g0376300	LOC_Os08g28870;	31.9948	30.9102	32.9265	47.9283	42.7386	64.5255	7.66834e-05	0.728405	up
180	Os10g0405300	LOC_Os10g26540;	15.0114	10.5954	11.9357	23.8483	18.086	22.811	0.00072356	0.824564	up
181	Os12g0554100	LOC_Os12g36750;	15.6332	22.2419	18.6034	4.28713	6.61663	7.16146	2.51162e-14	-1.62207	down
182	Os09g0268300	LOC_Os09g09520;	1.04417	0.896469	1.06323	0.21563	0	0.248943	0.00745703	-2.53441	down
183	Os02g0470600	LOC_Os02g27110,LOC_Os02g27130;	1.96408	3.06506	1.97403	0.303246	1.28381	0.954808	0.00504209	-1.45424	down
184	Os01g0209800	LOC_Os01g11160;	9.1477	13.1636	9.55707	4.88093	4.29156	6.46819	0.000135341	-0.991088	down
185	Os06g0691200	LOC_Os06g47600;	14.2019	9.82845	13.0731	25.9799	20.7197	18.1907	0.000600351	0.845134	up
186	Os01g0972900	LOC_Os01g74146;	2.3827	2.30033	1.79755	3.28112	5.5245	3.82913	0.00184644	0.9858	up
187	Os01g0192600	LOC_Os01g09670;	9.4006	11.0961	10.258	14.0736	18.7986	12.8814	0.00679979	0.598033	up
188	Os03g0845300	LOC_Os03g62830;	18.266	20.8496	19.0337	8.18462	16.0865	14.097	0.00885729	-0.665582	down
189	Os11g0115350	LOC_Os11g02369;	12.2251	8.92174	13.0547	24.7629	18.8315	15.426	0.00495728	0.824903	up
190	Os03g0304800	LOC_Os03g19220;	11.3232	11.0211	10.8828	14.4033	17.0128	24.3878	0.00679979	0.77341	up
191	Os11g0595200	LOC_Os11g38260;	2.09428	2.36232	2.65504	5.77299	3.86371	4.1457	0.005209	0.991767	up
192	Os01g0263900	--	0.771847	1.18007	0.593854	2.94817	2.51733	3.71893	3.49688e-05	1.87657	up
193	Os08g0467300	LOC_Os08g36410;	6.51135	5.2478	7.00684	11.0894	9.61137	8.78236	0.00410819	0.687788	up
194	Os01g0878700	LOC_Os01g65670;	4.98353	4.61627	4.68205	8.28197	8.57489	6.13599	0.00287944	0.72928	up
195	Os07g0273700	LOC_Os07g17230;	2.37733	2.54223	2.21803	1.02383	1.69169	1.19443	0.00273561	-0.846172	down
196	Os03g0666600	LOC_Os03g46400;	37.423	38.6194	35.9665	47.1082	50.9012	78.6476	0.00180997	0.6867	up
197	Os05g0104650	LOC_Os05g01440;	1.4308	1.63797	1.26296	0.703144	0.751474	0.855777	0.00421779	-0.874301	down
198	Os06g0585950	LOC_Os06g38590;	2.6475	4.41066	2.80465	1.19569	1.38094	2.26358	0.0070263	-1.00164	down
199	Os04g0644600	LOC_Os04g55180;	5.32221	6.79294	7.67061	11.3579	9.92339	19.1559	0.000683983	1.05591	up
200	Os05g0492100	--	4.41642	4.33527	5.42939	3.28193	2.54677	3.05242	0.00607473	-0.637884	down
201	Os03g0184100	LOC_Os03g08580;	50.46	33.752	33.2338	17.4786	13.3381	27.39	0.00118897	-0.975691	down
202	Os11g0276000	LOC_Os11g17600;	24.3275	31.3192	31.5972	13.5291	19.1899	15.268	2.29297e-06	-0.838361	down
203	Os02g0792100	--	16.2002	13.9497	14.8132	6.62257	7.65144	5.56451	1.28761e-09	-1.14789	down
204	Os01g0264000	LOC_Os01g15900;	0.577918	1.24028	1.24527	2.68746	4.65464	5.98762	4.66536e-07	2.13325	up
205	Os02g0744700	LOC_Os02g51070;	7.98737	7.57247	6.26268	10.6757	12.8375	10.7033	0.000652663	0.644295	up
206	Os10g0371000	LOC_Os10g22590;	267.602	220.06	228.795	418.734	342.766	347.808	2.6125e-05	0.66742	up
207	Os01g0221400	LOC_Os01g12190;	24.3769	24.9815	27.252	34.7439	39.0216	49.8529	0.00700981	0.714725	up
208	Oryza_sativa_newGene_5746	--	3.8013	4.10971	4.50677	2.74256	2.16041	2.00113	0.0017126	-0.789538	down
209	Os06g0105800	LOC_Os06g01670;	16.9227	16.1377	16.2241	31.5199	25.248	33.546	1.40661e-07	0.908881	up
210	Os05g0142900	LOC_Os05g05100;	1.83001	0.935943	2.57974	7.75556	2.95027	7.18395	0.00360998	1.79	up
211	Os01g0583900	LOC_Os01g40170;	0.330045	0.291052	0.432183	1.06869	0.881112	0.755129	0.00341434	1.38951	up
212	Os07g0171100	LOC_Os07g07540;	5.22904	5.4981	4.95606	7.39431	8.47768	9.30522	0.00108923	0.719088	up
213	Os08g0152400	LOC_Os08g05620;	2.60643	1.45292	1.8366	6.36555	4.65438	4.73991	0.000909734	1.45675	up
214	Oryza_sativa_newGene_1588	--	3.02172	3.37885	3.46644	2.38103	2.42094	3.11608	0.00140401	-0.685601	down
215	Os11g0629566	--	5.8045	7.83502	6.17069	2.32808	4.17272	3.95498	0.00126669	-0.903613	down
216	Os01g0853600	LOC_Os01g63444;	6.99174	7.58601	7.56232	3.10825	4.81679	3.77713	5.02086e-07	-0.888421	down
217	Os05g0555000	LOC_Os05g48140;	3.03691	3.23251	2.45983	1.29109	1.61375	1.63969	0.000199973	-0.916092	down
218	Os01g0929600	LOC_Os01g70440;	1284.59	1255.64	815.89	2697.83	1709.6	2190.83	1.61151e-05	1.01559	up
219	Os05g0132000	LOC_Os05g04160;	1.91996	1.86893	1.57283	0.792845	1.05995	0.59369	0.00987131	-1.09906	down
220	Os12g0119000	LOC_Os12g02640;	2.82903	3.14305	4.19958	1.62685	1.73479	2.17512	0.00987574	-0.844699	down
221	Os02g0620200	LOC_Os02g40690;	27.8681	25.5388	23.0454	54.963	43.0259	44.5112	3.32831e-06	0.935554	up
222	Os02g0153900	LOC_Os02g05960;	1.16542	1.36706	1.09432	0.531297	0.6148	0.422272	0.00171843	-1.17468	down
223	Oryza_sativa_newGene_2238	--	3.14034	3.18739	3.93409	0.975329	1.73289	1.00095	0.00213185	-1.19085	down
224	Os12g0197200	LOC_Os12g09550;	7.74843	8.95076	8.22783	4.70504	6.2959	5.67914	0.000811658	-0.614246	down
225	Oryza_sativa_newGene_4671	--	21.282	27.4032	35.082	18.3485	16.5668	13.4629	0.00118123	-0.753726	down
226	Os08g0178200	LOC_Os08g08070;	8.1523	12.3437	12.0395	7.09305	6.43363	5.0358	0.00381993	-0.775773	down
227	Os06g0566300	LOC_Os06g37010;	6.43892	6.39004	5.81761	13.2114	9.78836	9.127	0.000995177	0.822606	up
228	Os04g0492800	LOC_Os04g41540;	10.3676	12.372	12.8097	22.8417	17.6121	21.4311	0.000171536	0.834636	up
229	Os05g0495300	LOC_Os05g41550;	63.3581	87.9929	88.8932	39.5612	46.9926	37.0902	1.35238e-07	-0.928991	down
230	Os02g0505500	LOC_Os02g30240;	7.89483	6.87458	4.69306	3.10208	4.01643	2.93117	0.00853095	-0.924876	down
231	Oryza_sativa_newGene_3005	--	9.31783	10.4769	11.1495	9.28938	6.97887	7.84723	0.000683983	-0.656846	down
232	Os02g0174700	--	24.0825	17.2578	13.5398	9.97599	11.7074	9.79545	0.00201887	-0.770472	down
233	Os08g0531000	LOC_Os08g41880;	11.4393	10.5534	12.4924	5.45161	8.37027	6.29567	0.000437159	-0.686213	down
234	Os09g0478300	LOC_Os09g30130;	9.57222	18.49	11.1441	5.05101	4.54194	4.1709	9.29553e-09	-1.47811	down
235	Oryza_sativa_newGene_7739	--	2.37858	3.13578	4.82979	1.76264	1.87379	1.39562	0.00171843	-1.00743	down
236	Os02g0216700	--	25.7914	28.503	29.9677	12.7664	18.2298	15.1942	1.44366e-07	-0.84255	down
237	Os02g0588700	LOC_Os02g37610;	12.4153	9.70029	11.9224	19.4402	15.5376	22.799	0.000924328	0.798916	up
238	Os02g0174200	LOC_Os02g07790;	160.695	156.769	149.798	84.6578	98.1546	115.993	1.94519e-05	-0.616231	down
239	Os03g0847900	LOC_Os03g63060;	8.70275	6.79359	4.8899	2.42825	3.51228	4.19294	0.0033728	-1.01723	down
240	Os04g0636750	--	45.3788	24.2899	32.0563	58.2954	50.7561	51.333	0.0087479	0.69451	up
241	Os06g0600700	LOC_Os06g39900;	15.6009	14.9587	14.2016	8.74095	8.7278	8.63632	2.50977e-07	-0.715148	down
242	Oryza_sativa_newGene_1207	--	2.2843	3.70026	2.06122	0.200475	0	0.133386	1.81254e-10	-4.27524	down
243	Os07g0457500	LOC_Os07g27359;	1.09426	1.9806	2.16747	0.521913	0.548802	0.749632	0.0013555	-1.50015	down
244	Os07g0153150	LOC_Os07g05840;	12.5854	19.6182	44.875	2.99081	2.81001	3.83879	1.09431e-05	-3.03102	down
245	Os03g0128200	LOC_Os03g03610;	9.66905	12.1927	9.91276	3.17011	4.96227	3.48004	1.11596e-11	-1.43022	down
246	Os02g0682200	LOC_Os02g45770;	49.058	36.0786	38.4699	58.6328	72.329	60.6046	0.000104265	0.661362	up
247	Os03g0799900	LOC_Os03g58570;	9.17029	8.1009	6.89895	4.04381	5.02375	4.31578	2.6885e-05	-0.824416	down
248	Os07g0669700	LOC_Os07g47350;	9.49622	10.1367	9.16788	4.05212	5.63911	6.3656	0.000467957	-0.817954	down
249	Os10g0142600	LOC_Os10g05250;	3.57853	2.61495	4.00258	0.377704	0.149304	0.284223	1.95892e-17	-3.56566	down
250	Os02g0734600	LOC_Os02g50174;	90.5927	88.1234	105.407	175.104	111.902	145.642	0.00276355	0.648909	up
251	Oryza_sativa_newGene_8906	--	2.78982	2.51146	4.43813	0.590824	0.625203	1.84101	0.0022264	-1.52951	down
252	Os01g0720801	--	6.21818	7.42676	5.88056	4.17063	3.82374	4.02969	0.00410031	-0.6633	down
253	Oryza_sativa_newGene_6649	--	1.86703	1.55907	1.57356	0	0	0	4.23266e-09	-8.67078	down
254	Os05g0452500	--	8.08346	9.82115	10.3753	4.92247	6.65034	5.4945	0.00029248	-0.703293	down
255	Oryza_sativa_newGene_4433	--	1.07674	0.818647	0.962791	0	0.100201	0.094216	0.000171734	-3.88481	down
256	Os10g0557600	LOC_Os10g40810;	10.5189	5.59182	7.19824	14.0739	14.3587	13.8164	0.00253784	0.893429	up
257	Os08g0424600	--	10.9605	11.1874	11.6381	6.01277	8.36405	6.11167	4.55629e-05	-0.696171	down
258	Os11g0678200	LOC_Os11g45290;	7.15024	4.07942	5.97587	2.08438	1.51723	2.68829	0.00106832	-1.40807	down
259	Oryza_sativa_newGene_1714	--	1.1666	1.05685	1.17286	0.278884	0.138706	0.294344	0.00287944	-2.15257	down
260	Os06g0334100	--	4.5915	5.71582	6.08916	3.29	3.49496	2.18369	0.00893249	-0.72932	down
261	Os12g0115100	LOC_Os12g02320;	62.2694	52.8718	53.7996	116.806	94.1334	71.1516	0.000453911	0.777567	up
262	Os01g0929200	LOC_Os01g70410;	6.56318	4.69752	6.45592	10.1539	7.22556	12.5075	0.00825897	0.792277	up
263	Os06g0545800	LOC_Os06g35370;	48.3647	82.4422	81.3068	47.7535	39.7147	27.839	0.00291028	-0.844672	down
264	Os06g0301300	LOC_Os06g19730;	6.60532	10.1906	8.64266	1.79555	5.53995	4.58249	0.00727707	-1.08344	down
265	Oryza_sativa_newGene_8027	--	3.58111	2.97115	4.13476	1.46144	1.4728	1.58539	1.07608e-05	-1.19392	down
266	Os01g0552000	--	4.20695	5.44128	4.48701	1.80893	3.34564	2.54198	0.00367299	-0.858152	down
267	Os02g0204500	LOC_Os02g11000;	13.4303	16.5617	14.7171	9.90553	10.522	10.045	0.000245727	-0.590041	down
268	Os05g0379500	LOC_Os05g31530;	3.96453	3.19071	3.39623	1.78159	2.69231	2.35041	0.00833021	-0.604534	down
269	Oryza_sativa_newGene_9746	--	3.38954	4.33406	3.38402	1.21662	1.27186	1.39615	1.76017e-11	-1.41627	down
270	Os05g0571300	LOC_Os05g49630;	4.50672	3.97938	5.67799	2.67181	2.67596	2.85663	0.0070263	-0.709623	down
271	Oryza_sativa_newGene_5160	--	2.85501	1.9867	2.02413	1.53939	1.62137	1.03358	0.00300153	-0.884892	down
272	Os03g0582000	LOC_Os03g38540;	240.535	312.734	213.244	156.239	168.554	171.847	0.000242659	-0.647436	down
273	Os05g0549100	LOC_Os05g47560;	11.643	14.7376	14.4339	21.9698	20.9765	26.2657	2.96594e-06	0.812668	up
274	Os06g0720301	--	13.0698	17.4486	13.6535	4.99327	7.57636	6.50486	2.94818e-07	-1.18866	down
275	Oryza_sativa_newGene_3042	--	1.81859	1.58233	0.955997	0.420024	0.558191	0.305401	0.00273006	-1.93549	down
276	Os12g0105962	--	8.71146	12.3087	8.59259	3.62677	6.14066	6.36171	0.00181544	-0.856069	down
277	Oryza_sativa_newGene_4291	--	2.31507	3.18568	2.55725	1.46777	1.84852	1.53625	5.02107e-05	-0.766136	down
278	Os02g0288600	LOC_Os02g18690;	10.899	7.83291	8.50474	29.399	25.0319	16.0921	9.56363e-07	1.40958	up
279	Os03g0409600	LOC_Os03g29584;	8.08842	7.19746	9.64845	4.71938	5.21912	4.50075	0.00235375	-0.756783	down
280	Os02g0527300	LOC_Os02g32590;	12.7873	12.4694	12.8489	7.55683	8.67051	7.7249	5.63507e-05	-0.639506	down
281	Os11g0123066	LOC_Os11g02964;	2.55029	2.75682	2.92094	1.59102	1.70138	1.73572	0.00375707	-0.678552	down
282	Os12g0566050	--	0.577924	1.47761	0.829654	0.110842	0.093838	0.107505	5.73627e-05	-3.0548	down
283	Os09g0405500	--	39.7716	54.8787	62.1511	38.6525	26.3921	20.9386	0.00660715	-0.825892	down
284	Os11g0104050	LOC_Os11g01300;	17.9083	14.8953	15.2496	22.3569	22.9562	28.1946	0.00296712	0.644526	up
285	Os06g0188550	LOC_Os06g08884;	13.0352	13.1185	13.9186	7.37409	10.2522	8.13513	0.000511396	-0.611967	down
286	Os02g0724000	LOC_Os02g49230;	28.6356	19.4822	21.7622	8.85337	11.2028	15.8021	0.000213244	-0.934218	down
287	Os06g0695400	LOC_Os06g48020;	37.9104	38.0459	57.709	73.6497	54.5126	91.8213	0.00479426	0.754428	up
288	Os05g0247800	LOC_Os05g15880;	3.48202	9.27079	4.70046	1.35748	1.09846	2.54433	0.000599232	-1.7701	down
289	Os05g0105800	LOC_Os05g01530;	39.9809	37.6631	38.335	76.627	51.6383	58.8961	0.00201315	0.730541	up
290	Os04g0483450	--	4.05683	2.25425	2.68277	0.300075	1.2243	0.356678	0.000142456	-2.23542	down
291	Os05g0349000	LOC_Os05g28170;	2.95558	3.07388	2.5359	1.62599	1.78571	1.1193	0.00110134	-0.87683	down
292	Os05g0550000	LOC_Os05g47670;	11.2697	10.867	8.74974	21.0919	13.3442	20.4154	0.00105404	0.868131	up
293	Oryza_sativa_newGene_2976	--	6.32795	8.54404	4.55846	1.48206	3.23392	2.22344	1.46002e-06	-1.46959	down
294	Os11g0689100	LOC_Os11g46210;	0.408902	0.810492	0.62031	0.112384	0.301682	0.100762	0.00686143	-1.78946	down
295	Os06g0586900	--	8.26948	9.24126	6.94482	1.46722	5.41287	2.07482	0.000188851	-1.2253	down
296	Os01g0369700	LOC_Os01g27210;	16.5449	27.4065	24.5905	12.8723	10.9245	13.5776	0.00181044	-0.839372	down
297	Os11g0657400	LOC_Os11g43640;	30.1787	43.1956	56.3065	23.8475	26.1497	19.0554	0.00027956	-0.879928	down
298	Os04g0409200	LOC_Os04g33460;	27.9591	34.9226	28.0552	11.5374	19.8997	16.7642	0.000228254	-0.895236	down
299	Os03g0819400	LOC_Os03g60480;	6.9908	6.53166	7.35062	11.9802	14.9044	9.32778	0.00136034	0.821263	up
300	Os09g0480700	LOC_Os09g30310;	10.5619	7.618	8.18999	14.7125	11.8345	15.361	0.00797564	0.705393	up
301	Oryza_sativa_newGene_6794	--	4.33028	5.1643	3.9469	2.45823	3.45297	2.64066	0.00226737	-0.67209	down
302	Os02g0733300	LOC_Os02g50040;	2.27609	2.02537	1.86502	2.75632	4.83762	3.85828	0.00360998	0.911395	up
303	Os03g0399600	--	5.24274	6.23602	5.72934	3.01492	4.08204	3.68518	0.000652663	-0.64599	down
304	Os03g0733600	LOC_Os03g52320;	17.8299	12.5158	11.8423	26.2744	25.6981	19.4082	0.00102303	0.793113	up
305	Os09g0252700	LOC_Os09g07900;	3.57755	4.7437	3.18363	0.963968	1.96182	1.77907	6.264e-05	-1.2715	down
306	Os10g0208500	LOC_Os10g14180;	8.57506	8.49718	7.37849	6.09718	7.71559	5.93375	0.00165329	-0.630223	down
307	Os01g0187900	LOC_Os01g09280;	30.6556	31.8834	33.9316	48.3174	35.5072	61.0889	0.00890171	0.62259	up
308	Os08g0174100	LOC_Os08g07720;	6.5622	9.38751	7.81335	23.1191	11.6962	16.9844	0.000133527	1.16667	up
309	Os06g0298200	LOC_Os06g19444;	11.633	7.31583	9.75586	4.08606	4.53676	5.77935	0.000123566	-0.962502	down
310	Oryza_sativa_newGene_42	--	3.04887	2.82653	2.84784	1.73368	1.59719	1.75413	0.00556915	-0.735472	down
311	Os02g0125700	LOC_Os02g03330;	12.6619	9.96685	11.2883	20.8815	25.2846	23.9524	7.8053e-11	1.07602	up
312	Os12g0640950	--	14.48	39.3704	44.0393	8.59999	6.20874	4.90418	1.40691e-07	-2.26726	down
313	Os07g0599900	LOC_Os07g40890;	118.657	138.373	105.873	62.3056	65.8514	90.338	0.000531649	-0.702735	down
314	Oryza_sativa_newGene_290	--	0.570338	0.850012	0.960056	0.226532	0.308795	0.19963	0.00535499	-1.63384	down
315	Os01g0898800	LOC_Os01g67320;	10.3588	11.4137	12.2568	19.3935	16.1907	21.0881	0.000711076	0.768664	up
316	Os02g0131400	LOC_Os02g03870;	8.64292	8.2062	9.7394	20.8728	11.2089	18.5839	0.000395244	0.972314	up
317	Os04g0308100	LOC_Os04g24300;	2.63257	5.97274	3.89676	0.677208	1.44371	1.18764	5.32057e-05	-1.9027	down
318	Os12g0509400	LOC_Os12g32499;	5.35057	5.29115	5.14941	2.98159	3.578	2.87227	0.00141551	-0.708979	down
319	Os01g0963400	LOC_Os01g73234;	26.4297	25.5323	27.5322	45.854	35.6547	45.1944	0.000292815	0.709058	up
320	Os01g0260000	LOC_Os01g15530;	3.07214	2.85122	2.39666	1.24223	1.16625	1.04378	0.00305984	-1.21638	down
321	Oryza_sativa_newGene_1527	--	1.11214	1.18964	1.41312	0.341268	0.53925	0.693468	0.0014632	-1.24346	down
322	Oryza_sativa_newGene_9217	--	0.61666	0.965851	0.624191	0.072823	0.220356	0.091963	0.000534001	-2.43221	down
323	Os01g0923800	LOC_Os01g69930;	3.68949	5.44005	5.10854	2.55591	2.58693	2.64397	0.000818008	-0.839964	down
324	Os02g0744200	LOC_Os02g51040;	15.925	12.7857	15.3838	34.8187	26.9255	32.56	2.00562e-10	1.1345	up
325	Oryza_sativa_newGene_4471	--	2.09013	1.75988	2.17414	1.06096	0.880526	0.987061	0.000229868	-1.03859	down
326	Os05g0420900	LOC_Os05g34800;	7.49917	4.56094	5.30838	9.42082	10.8957	8.52059	0.00223647	0.763206	up
327	Os08g0470200	LOC_Os08g36630;	11.1207	12.6578	9.51693	5.98928	6.40571	7.76415	0.0058653	-0.692922	down
328	Os09g0556400	LOC_Os09g38410;	20.5322	20.1768	20.4533	31.7065	24.6634	35.1776	0.00190868	0.617709	up
329	Oryza_sativa_newGene_9891	--	5.2768	6.94148	5.87135	3.15804	4.22015	3.39663	0.00337607	-0.723307	down
330	Os06g0237400	LOC_Os06g13040;	8.25879	7.50388	11.0021	20.3441	11.9669	15.2754	0.00358413	0.872786	up
331	Os06g0618000	LOC_Os06g41380;	4.17644	3.88631	4.10065	1.55705	2.71842	2.29924	0.00794888	-0.867416	down
332	Os08g0393600	LOC_Os08g30340;	0.904739	1.30864	1.49344	0.182796	0.628517	0.270494	0.00893354	-1.73716	down
333	Oryza_sativa_newGene_5761	--	4.09688	2.93309	3.48267	1.46749	1.55082	1.50033	9.12608e-09	-1.4563	down
334	Os08g0277200	LOC_Os08g17500;	24.4965	19.8082	21.7835	46.0514	26.0603	53.8876	0.000525038	0.971281	up
335	Os03g0344400	--	1.74747	3.20323	1.15441	0	0	0	2.73892e-09	-8.92817	down
336	Os05g0489800	LOC_Os05g41080;	11.6689	10.2134	12.822	20.0574	28.7197	16.1279	0.000531992	0.928749	up
337	Os05g0161200	LOC_Os05g06890;	3.07271	3.16226	4.33492	5.13145	6.60163	6.54242	0.00147697	0.812998	up
338	Os03g0411800	LOC_Os03g29850;	5.21729	6.02853	5.40888	7.49772	8.14063	12.3296	0.00729763	0.77584	up
339	Os07g0658600	LOC_Os07g46480;	0.827395	1.14486	0.914305	1.96401	2.52171	1.87149	0.00394434	1.15038	up
340	Oryza_sativa_newGene_6347	--	2.72885	3.50591	2.76204	1.07652	1.53932	1.57208	0.00796029	-1.16531	down
341	Os06g0499301	LOC_Os06g30420;	6.50858	8.21336	6.32482	3.84241	4.76595	3.11811	0.00126669	-0.815937	down
342	Oryza_sativa_newGene_1503	--	3.16398	3.17675	3.6071	2.32999	1.84172	2.57608	0.00994315	-0.61514	down
343	Os06g0545601	--	1.11896	5.01233	5.3468	0.717644	1.3007	1.18075	0.00401764	-1.82496	down
344	Os02g0168100	LOC_Os02g07160;	13.7262	15.1021	13.3617	23.1188	21.857	27.7124	1.34669e-05	0.815579	up
345	Oryza_sativa_newGene_6263	--	2.01004	1.65097	2.5031	0.917383	1.21786	0.937288	6.93045e-05	-1.07869	down
346	Os10g0572500	LOC_Os10g42196;	6.57768	9.94154	6.79148	2.85865	4.80965	4.40258	0.00116336	-0.929559	down
347	Os08g0259100	LOC_Os08g15920;	4.28154	4.50913	4.95966	2.47286	3.01275	3.01046	0.00523226	-0.668675	down
348	Os11g0213800	LOC_Os11g10770;	2.91457	2.32516	1.93399	0.67372	1.28002	0.667119	0.00181544	-1.41949	down
349	Os08g0153600	LOC_Os08g05750;	7.53979	7.62776	6.55882	3.68857	4.78207	4.87183	0.00127853	-0.675493	down
350	Os01g0682001	LOC_Os01g48960;	24.5354	29.9579	18.1355	3.68968	10.8544	8.35022	0.00611313	-1.65252	down
351	Os04g0517000	LOC_Os04g43670;	20.7017	21.3742	17.7367	33.9418	34.1938	24.6762	0.00189295	0.667196	up
352	Os11g0537375	--	25.3545	27.593	29.6367	15.1847	16.6551	20.2957	0.000142456	-0.634826	down
353	Oryza_sativa_newGene_6029	--	12.4312	10.5385	10.0071	6.23522	9.43023	7.5952	0.00273006	-0.635491	down
354	Os09g0547900	LOC_Os09g37580;	4.27645	5.49823	4.19465	1.49625	2.55805	1.95133	4.45269e-06	-1.19833	down
355	Os07g0653300	--	1.6678	1.71516	1.73139	0.568803	0.843134	0.923922	0.00555939	-1.10495	down
356	Oryza_sativa_newGene_4197	--	3.15382	3.36695	5.00466	2.05791	1.91686	1.73003	0.00989522	-0.996397	down
357	Os01g0315850	--	3.36491	3.9419	3.56725	1.02586	1.68853	1.939	0.00187665	-1.19712	down
358	Os01g0652100	LOC_Os01g46350;	4.41598	3.47968	4.03524	6.01562	5.33108	6.45239	0.00588406	0.611441	up
359	Os09g0497500	LOC_Os09g32230;	97.7558	95.0735	127.951	187.799	125.135	168.243	0.00567141	0.623996	up
360	Os11g0155500	LOC_Os11g05690;	6.30043	8.69641	6.56894	4.20459	4.07693	4.14676	0.00216522	-0.762288	down
361	Os08g0179150	LOC_Os08g08140;	2.87778	4.30598	1.2751	0.817353	0.608641	0.443656	0.00127546	-2.09896	down
362	Os01g0647850	--	10.9525	12.0278	11.5338	7.15242	8.57228	6.36644	0.000437159	-0.615411	down
363	Os10g0567400	LOC_Os10g41780;	12.2375	17.505	16.1885	22.41	22.9899	27.686	0.00151028	0.675864	up
364	Os11g0685300	--	4.92631	6.93466	4.82594	2.19598	2.43553	2.11264	0.000200817	-1.26911	down
365	Oryza_sativa_newGene_9084	--	3.32212	3.52158	4.12507	1.82108	2.76504	1.44851	0.00227597	-0.946257	down
366	Os06g0562300	LOC_Os06g36680;	12.2671	9.35685	9.82262	15.2498	18.2631	13.6245	0.00326199	0.613681	up
367	Os06g0626050	--	7.51332	11.5171	8.6604	3.32538	2.95181	4.3275	9.92964e-05	-1.34908	down
368	Os02g0258200	LOC_Os02g15810;	25.4796	19.6622	21.4516	27.8823	39.6812	36.1168	0.00065674	0.664488	up
369	Os09g0518266	--	1.81637	2.22881	2.60896	0.653751	0.735813	0.74904	0.000183108	-1.59581	down
370	Os08g0307000	LOC_Os08g21541;	9.38947	11.1526	9.62985	4.83023	6.37334	4.8248	1.99616e-07	-0.886564	down
371	Oryza_sativa_newGene_6410	--	5.07009	5.68788	4.70019	2.7315	3.77173	2.61076	0.000531844	-0.735252	down
372	Os11g0569500	LOC_Os11g36150;	4.48159	4.93353	4.23789	2.96629	3.05726	2.62564	0.00205597	-0.625006	down
373	Os02g0584800	LOC_Os02g37300;	1.49947	12.4427	10.314	0.189577	0.670217	0.832347	0.00219157	-3.76875	down
374	Os02g0705100	LOC_Os02g47620;	3.46326	4.80608	4.89263	12.0718	9.54863	10.0985	4.24738e-08	1.30369	up
375	Os08g0429800	LOC_Os08g33300;	5.47211	4.94313	5.67523	12.4779	7.2046	10.6006	0.000475258	0.952827	up
376	Os01g0384800	LOC_Os01g28790;	5.24805	15.2568	11.2521	3.19695	2.3811	3.48947	5.63507e-05	-1.7677	down
377	Oryza_sativa_newGene_1376	--	1.86707	2.15831	2.21169	0.327517	1.20155	0.704027	0.00399563	-1.46453	down
378	Os09g0449800	LOC_Os09g27680;	2.01138	1.84891	1.92992	4.16563	3.80267	3.61593	0.00833021	1.02904	up
379	Os08g0114200	LOC_Os08g02220;	1.14235	0.748176	0.882477	4.0057	2.47712	2.4463	1.27087e-05	1.73213	up
380	Os06g0295500	--	13.0666	15.0308	13.2266	5.87241	8.65096	8.02391	1.94801e-07	-0.904319	down
381	Os01g0915400	LOC_Os01g68680;	16.2823	23.706	19.1087	9.02913	13.692	12.63	0.00951455	-0.720676	down
382	Os10g0478450	LOC_Os10g33830;	9.20184	9.22142	8.59037	3.328	3.30763	4.79741	0.000111291	-1.20981	down
383	Os02g0673100	LOC_Os02g45160;	1.55173	1.80595	1.34899	0.583383	0.535883	0.646258	0.00703084	-1.09762	down
384	Os09g0451133	--	1.42786	4.99127	2.31446	0.152928	0.537844	0.905383	0.00125277	-2.42669	down
385	Os01g0852900	LOC_Os01g63400;	8.34181	8.98557	8.37881	4.39599	7.08502	4.90968	0.00523612	-0.626238	down
386	Os02g0113300	LOC_Os02g02240;	6.17734	5.24606	7.0561	3.12299	4.10519	3.23395	0.00357985	-0.793093	down
387	Os01g0605700	LOC_Os01g42090;	76.6827	63.4501	82.0865	134.852	96.0765	141.292	0.000148555	0.782074	up
388	Os12g0124500	LOC_Os12g03110;	25.8305	27.3161	22.9475	55.8718	34.0932	42.9106	0.000695193	0.84554	up
389	Os06g0581300	LOC_Os06g38320;	16.6667	23.3426	23.0268	31.156	32.6736	34.2688	0.00049255	0.67137	up
390	Os12g0114500	LOC_Os12g02290;	82.8766	85.3919	89.9875	194.942	173.205	139.055	4.19e-10	1.00833	up
391	Os03g0835150	LOC_Os03g61900;	32.4982	27.5771	27.5008	57.2179	34.2437	54.9951	0.00223318	0.782623	up
392	Os12g0528801	--	33.065	29.7487	31.7183	46.6877	44.4549	47.7609	0.00301139	0.587795	up
393	Os06g0184700	LOC_Os06g08560;	6.91143	8.49895	8.29488	1.91925	3.74736	5.39492	0.00378673	-1.08092	down
394	Os11g0203400	--	1.62749	1.31068	1.22782	0.499422	0.525732	0.398673	0.00429013	-1.50437	down
395	Os09g0405900	LOC_Os09g24100;	32.299	64.8091	68.3732	17.7278	18.31	10.1668	0.000846511	-1.80907	down
396	Os08g0503700	LOC_Os08g39370;	0.91804	0.675409	2.09144	6.49504	3.0983	1.95284	0.00375707	1.68503	up
397	Os09g0533200	LOC_Os09g36280;	0.852432	1.50306	1.5456	7.13512	2.39475	2.15802	0.00963077	1.62712	up
398	Oryza_sativa_newGene_4676	--	1.36299	0.841499	1.43057	0.432297	0.48658	0.554849	0.0040483	-1.24022	down
399	Os04g0525000	LOC_Os04g44340;	6.68264	4.07914	4.74283	1.86254	1.93168	0.769778	9.27585e-05	-1.71711	down
400	Os02g0714100	LOC_Os02g48350;	15.5717	13.0449	12.0893	21.0554	18.6556	19.9478	0.00227526	0.585885	up
401	Oryza_sativa_newGene_8394	--	6.37344	4.77217	6.43402	3.53001	4.91723	3.71624	0.00288603	-0.657112	down
402	Os02g0153100	LOC_Os02g05910;	2.14033	2.68547	1.8526	0.502454	1.22884	0.942354	0.000831396	-1.30339	down
403	Os07g0671500	LOC_Os07g47490;	16.9794	17.762	18.4803	9.33134	12.0436	10.271	5.25697e-07	-0.794529	down
404	Os03g0102300	LOC_Os03g01240;	2.79135	3.57314	2.40074	0.546884	0.927724	1.71567	0.00558911	-1.43463	down
405	Os04g0649700	LOC_Os04g55620;	4.41456	3.30093	4.89895	8.0264	7.55945	6.46414	0.00407378	0.668296	up
406	Os04g0439400	LOC_Os04g35880;	20.6125	28.7806	19.1347	4.45914	9.99672	7.37667	8.38012e-09	-1.63415	down
407	Os05g0210201	--	1.58363	4.10055	3.72368	0.473856	0.904906	1.07827	0.00162436	-1.91181	down
408	Os02g0467400	--	7.04171	6.71987	7.32981	4.24144	4.89423	3.90792	0.000122103	-0.670925	down
409	Os03g0802500	LOC_Os03g58790;	20.8114	29.3645	21.0427	9.34362	10.9589	13.764	2.09614e-06	-1.03709	down
410	Oryza_sativa_newGene_2359	--	3.17149	3.45321	4.07834	1.87424	2.62775	1.6217	0.00536366	-0.761389	down
411	Os03g0106200	LOC_Os03g01580;	12.0152	15.9641	12.4101	7.26142	8.74691	9.93528	0.00258366	-0.612026	down
412	Os02g0202300	LOC_Os02g10794;	4.31354	4.89096	2.59745	1.03765	2.17579	1.35644	0.00287944	-1.34174	down
413	Os05g0390550	--	6.52697	7.28772	5.18077	9.48887	10.3035	9.91469	0.00211397	0.675937	up
414	Os03g0638000	LOC_Os03g43684;	10.9354	16.4085	13.6379	6.07011	8.06847	6.70763	0.000799474	-0.94771	down
415	Os03g0262500	LOC_Os03g15600;	13.5393	15.094	14.7092	8.46067	8.90917	8.72392	1.61747e-07	-0.665428	down
416	Os02g0816600	LOC_Os02g57160;	11.3004	16.8088	14.4082	25.8776	24.4552	33.712	8.13945e-05	0.955177	up
417	Oryza_sativa_newGene_3968	--	2.62205	3.22121	3.54541	1.77451	1.84078	1.83298	0.000593094	-0.711993	down
418	Os12g0189300	LOC_Os12g08760;	11.4998	10.5889	15.1132	22.245	16.42	18.3332	0.00751071	0.65248	up
419	Os01g0759900	LOC_Os01g55500;	11.2811	10.6487	9.00668	14.3256	18.0979	13.8165	0.00273561	0.607716	up
420	Os01g0976200	LOC_Os01g74480;	592.828	654.643	610.809	330.993	419.622	453.178	2.72914e-05	-0.599608	down
421	Os03g0303100	LOC_Os03g19090;	9.754	10.2534	8.92401	12.6204	17.247	14.6891	0.000582793	0.647564	up
422	Os03g0679700	LOC_Os03g47610;	29.1423	21.6184	22.0408	9.85645	11.62	11.554	1.3224e-12	-1.13835	down
423	Os12g0115000	LOC_Os12g02310;	13.0178	11.3141	15.3313	29.8464	27.2505	25.9704	1.22729e-05	1.09872	up
424	Os02g0771700	LOC_Os02g53200;	53.3378	52.4408	48.7846	77.9965	78.777	80.3872	1.29059e-09	0.64936	up
425	Os10g0559700	LOC_Os10g41030;	9.14882	11.9894	8.8692	2.71417	5.87072	5.90162	0.000584059	-1.03444	down
426	Os09g0451266	--	1.36362	1.58713	2.02805	0.264211	0.691655	0.293146	0.00112934	-1.97022	down
427	Os04g0393500	LOC_Os04g32300;	1.08311	0.280014	0.553203	3.69477	2.94197	1.60612	0.00432224	2.15073	up
428	Os03g0281500	LOC_Os03g17300;	5.97493	5.39346	3.97836	1.09452	2.18374	2.64207	7.69648e-05	-1.35373	down
429	Os04g0447400	LOC_Os04g37460;	89.0924	129.728	142.544	72.9639	71.4907	67.3357	0.000204085	-0.73997	down
430	Os04g0331650	--	4.69318	4.4414	5.43351	1.9061	2.38884	1.8038	4.42079e-05	-1.2255	down
431	Os04g0497000	LOC_Os04g41960;	4.63166	15.5298	11.0396	2.53285	2.76956	3.08543	7.67291e-06	-1.85592	down
432	Os08g0529000	LOC_Os08g41720;	0.43198	0.470936	0.472903	0.875975	1.30944	1.98338	0.00397833	1.61163	up
433	Os04g0278900	LOC_Os04g20990;	11.4827	12.2736	12.3142	16.8875	19.5156	18.8117	1.76345e-05	0.646351	up
434	Os03g0264150	--	9.35058	8.94402	8.32852	14.1214	14.3532	13.1504	7.77315e-06	0.677037	up
435	Os03g0757400	--	22.4189	21.1691	32.2714	13.2731	14.8956	14.6707	0.000118639	-0.794711	down
436	Os07g0591800	LOC_Os07g40224;	15.4292	16.9998	14.2527	5.88712	10.0913	7.20896	1.00593e-05	-0.988627	down
437	Os06g0194900	LOC_Os06g09450;	350.534	479.857	398.075	232.609	256.854	260.124	1.08709e-05	-0.68933	down
438	Os10g0382600	LOC_Os10g24100;	13.6128	19.6205	14.6725	5.31017	10.6693	7.86425	0.000688791	-0.9886	down
439	Os05g0446000	LOC_Os05g37350;	3.59207	4.14048	3.21131	1.07268	2.53827	1.51049	0.00143021	-1.08067	down
440	Os01g0184200	LOC_Os01g08880;	39.989	38.3665	36.7506	20.8596	30.4589	23.6189	0.000160426	-0.594315	down
441	Os03g0807900	LOC_Os03g59320;	1.92426	2.56246	3.50157	8.1069	3.78874	8.67181	0.00183	1.38085	up
442	Oryza_sativa_newGene_9089	--	0.97796	0.461712	0.645831	0.133413	0.074518	0	0.00116941	-3.17674	down
443	Os11g0519500	LOC_Os11g31820;	5.98044	6.34335	7.05895	3.89246	4.48909	4.20987	0.00188719	-0.593818	down
444	Os01g0552500	--	22.4257	22.3011	22.7587	13.1211	16.2027	13.5804	3.77869e-05	-0.625065	down
445	Os11g0213000	LOC_Os11g10710;	4.58535	4.07823	4.22387	1.98727	2.12583	2.17286	1.82926e-06	-1.00327	down
446	Os04g0496300	LOC_Os04g41900;	8.84318	7.18727	6.12354	19.4702	16.3172	11.8591	6.11689e-05	1.14258	up
447	Os03g0300100	--	7.4083	9.60558	7.00133	2.74772	4.9998	5.65977	0.00892387	-0.821869	down
448	Os11g0655300	LOC_Os11g43420;	2.05495	3.21374	2.63787	1.23723	1.21022	1.63688	0.00477595	-0.920087	down
449	Os01g0356951	--	0.711476	1.17764	2.20971	3.94443	7.02102	2.53725	0.00946562	1.72846	up
450	Oryza_sativa_newGene_4036	--	1.23862	1.00682	1.53451	0.705063	0.608415	0.345767	0.00062789	-1.19902	down
451	Os12g0543600	LOC_Os12g35890;	10.685	12.0056	11.8981	20.4168	17.9839	17.0542	0.000106653	0.716025	up
452	Os12g0226900	LOC_Os12g12580;	4.50387	4.8265	3.27214	6.1811	11.4912	7.01444	0.00314396	0.987449	up
453	Oryza_sativa_newGene_283	--	12.784	12.6895	11.5582	6.01825	7.69447	7.62955	0.00083272	-0.768464	down
454	Os04g0521600	LOC_Os04g44090;	1.99179	1.94167	2.83589	1.20814	1.27515	0.897404	0.00575565	-0.968025	down
455	Os06g0164300	LOC_Os06g06890;	27.009	28.9353	34.8644	17.0119	20.3061	16.1043	0.000113378	-0.73637	down
456	Os02g0218500	--	3.03519	3.70925	3.31622	1.18809	1.83717	1.32448	0.00013989	-1.18419	down
457	Os01g0896400	LOC_Os01g67110;	10.5926	8.73728	7.17958	12.7489	18.7009	15.7649	0.0011424	0.856282	up
458	Os12g0552400	LOC_Os12g36630;	58.5299	70.4295	86.8222	55.1218	40.8195	39.4005	0.00893672	-0.635176	down
459	Os03g0629900	LOC_Os03g43114;	3.44851	3.47318	3.64613	2.09477	2.21414	1.89396	0.000440188	-0.751864	down
460	Oryza_sativa_newGene_705	--	11.1363	10.6605	10.2938	5.31433	7.79955	6.94191	0.00386152	-0.631545	down
461	Os11g0549537	LOC_Os11g34680;	9.11144	13.8238	18.4057	5.83493	6.27062	5.71324	0.000376439	-1.18207	down
462	Os04g0311400	LOC_Os04g24600;	3.90411	3.91705	3.79957	8.52351	5.77715	7.21309	0.00083272	0.920363	up
463	Os07g0203275	--	4.58694	6.21857	4.84959	1.53479	1.90949	2.85063	0.00355604	-1.27787	down
464	Os04g0645700	--	7.79701	8.02706	6.69819	13.4857	9.99127	11.6042	0.00899094	0.676931	up
465	Os09g0368500	LOC_Os09g20284;	12.8929	11.4355	14.1977	21.8269	17.9676	26.7349	0.000124612	0.82217	up
466	Os05g0279900	LOC_Os05g20020;	2.41492	3.28555	3.90347	6.62687	8.44242	6.12233	0.000418433	1.15905	up
467	Oryza_sativa_newGene_7278	--	2.05957	1.19684	1.64053	0.536289	0.382388	0.572473	0.00567472	-1.67905	down
468	Os03g0326500	LOC_Os03g21000;	40.3715	36.8172	40.6224	66.5511	53.5637	57.7006	0.000474305	0.630796	up
469	Os09g0419100	--	10.1545	7.96245	6.8515	3.88887	4.93905	3.63585	1.14508e-06	-1.08606	down
470	Os06g0292400	LOC_Os06g18900;	10.8404	10.3182	11.0338	6.07592	8.21552	6.40694	0.000226406	-0.610834	down
471	Os10g0254720	--	7.23732	13.0517	14.3343	6.95398	5.79812	3.39041	0.00490803	-1.06438	down
472	Os08g0295100	LOC_Os08g19830;	34.4	44.8088	39.3447	18.2722	29.8328	25.9691	0.00333481	-0.657331	down
473	Os01g0640100	LOC_Os01g45290;	1.0926	1.51212	1.63003	0.111085	0.221875	0.231303	2.11833e-07	-2.87185	down
474	Os01g0968600	LOC_Os01g73750;	6.7296	7.88112	7.71159	2.54776	5.06835	3.75534	0.000314484	-0.954909	down
475	Os08g0332800	LOC_Os08g24400;	3.55631	5.29021	3.63681	1.08511	1.71027	1.23181	5.5002e-07	-1.60753	down
476	Os01g0297700	LOC_Os01g19290;	30.7921	27.6934	31.0427	57.4463	36.2782	59.1267	0.00038269	0.811043	up
477	Os02g0203000	LOC_Os02g10860;	8.03326	6.4969	4.96181	11.6107	9.9131	12.6552	0.00891703	0.84533	up
478	Os02g0288400	LOC_Os02g18670;	4.62957	5.38687	3.41124	1.49747	2.66263	2.56037	0.00110134	-0.978261	down
479	Os05g0135500	LOC_Os05g04500;	8.08004	9.70843	5.96655	3.72497	5.37851	4.01918	0.00625	-0.832159	down
480	Os10g0147200	LOC_Os10g05660;	7.56789	4.37372	7.59982	12.8738	9.29856	15.3159	0.00901822	0.975749	up
481	Os01g0939600	LOC_Os01g71280;	32.6194	39.0477	26.0225	14.0105	22.9259	22.2389	0.00394217	-0.701238	down
482	Os02g0536500	LOC_Os02g33330;	1.96949	1.80212	2.37999	4.39432	3.89412	5.03617	0.00412071	1.13974	up
483	Os06g0199100	LOC_Os06g09880;	5.77039	4.75092	4.79171	2.28697	3.94471	2.74317	0.00224198	-0.748054	down
484	Os11g0491600	LOC_Os11g29920;	1.03756	1.56608	1.24845	0.278797	0.663147	0.309594	0.0017879	-1.59689	down
485	Os12g0550800	LOC_Os12g36430;	6.85589	8.40433	10.0448	5.18925	4.71692	4.45625	1.83675e-06	-0.982544	down
486	Os05g0529700	LOC_Os05g45350;	6.59402	6.65513	8.81626	17.8147	12.7255	20.2531	4.47285e-07	1.23088	up
487	Os09g0346500	LOC_Os09g17740;	58.6389	87.5702	86.4139	137.907	123.987	100.922	0.00246768	0.673955	up
488	Os04g0140666	LOC_Os04g05470;	7.46359	7.73782	11.309	3.20106	3.37602	5.34426	0.000369747	-1.12211	down
489	Oryza_sativa_newGene_5470	--	2.72842	1.98288	2.38774	0.024075	0.110053	0.057071	2.56316e-27	-5.14224	down
490	Os05g0140500	LOC_Os05g04850;	36.1325	31.9204	35.8466	50.4922	49.5047	53.6591	2.42942e-05	0.596582	up
491	Os10g0395150	LOC_Os10g25565;	1.49276	3.6152	4.24063	0.946149	1.19621	0.363506	0.000712752	-1.86621	down
492	Os02g0553802	--	3.38007	4.78411	3.58665	1.16238	2.71824	2.09368	0.00860863	-0.960866	down
493	Os02g0294100	LOC_Os02g19200;	5.7192	6.00834	5.19582	2.70605	3.52004	3.1152	7.26211e-07	-0.842824	down
494	Oryza_sativa_newGene_5264	--	11.1232	12.7326	11.8801	6.24449	7.00539	7.06309	7.1572e-05	-0.739769	down
495	Os02g0125566	--	7.00957	7.56464	6.66852	2.7748	4.49997	4.48226	0.00532254	-0.831614	down
496	Os09g0306232	--	2.39627	3.34519	2.34849	0.80192	0.946448	0.692752	0.000135076	-1.70315	down
497	Os05g0100100	LOC_Os05g01010;	4.47714	4.43664	5.32166	8.23072	10.1582	6.9195	0.000894811	0.858169	up
498	Os01g0346700	LOC_Os01g24440;	8.04621	6.21824	6.12188	12.6606	10.5515	10.044	0.00488666	0.744074	up
499	Os11g0631600	LOC_Os11g41360;	101.954	136.843	122.994	79.5108	69.6429	83.7474	0.00109014	-0.602386	down
500	Os03g0213900	LOC_Os03g11520;	71.3063	70.0513	71.0373	41.8385	53.1429	43.5132	4.03217e-07	-0.615945	down
501	Os01g0777700	LOC_Os01g56980;	12.6517	13.7114	12.9255	6.11477	8.68988	9.08954	0.000241318	-0.69288	down
502	Os10g0427100	--	2.11725	2.2513	1.74134	0.978958	0.970669	0.955828	0.00102975	-1.03304	down
503	Os06g0517700	LOC_Os06g32600;	48.8867	29.4705	45.582	139.059	115.86	95.2056	1.84106e-12	1.53633	up
504	Os06g0707700	LOC_Os06g49380;	1.9739	2.97831	2.49676	0.530848	1.6135	0.802502	0.00372288	-1.32602	down
505	Oryza_sativa_newGene_3229	--	1.0299	0.996885	1.20673	0.426772	0.791156	0.565371	0.00834103	-0.840116	down
506	Os02g0521366	LOC_Os02g32170;	0.952293	0.943125	1.00529	2.2503	2.01748	2.8334	4.07819e-05	1.32	up
507	Os06g0296100	LOC_Os06g19210;	2.06543	2.72017	2.61077	0.957948	1.54896	1.37694	0.00648872	-0.906864	down
508	Os10g0556700	LOC_Os10g40780;	4.12667	6.29788	3.31567	0.495939	2.15204	1.43626	0.000883582	-1.73926	down
509	Os03g0817700	--	13.0992	14.2865	14.3149	8.13113	9.97849	8.25829	0.0004958	-0.634139	down
510	Os06g0683400	LOC_Os06g46950;	5.31463	25.0072	20.9184	2.38072	2.12702	3.04868	0.00105795	-2.72413	down
511	Os08g0197400	LOC_Os08g09750;	1.9859	2.50719	1.75895	3.56194	4.087	3.06824	0.00999066	0.805945	up
512	Os06g0675700	LOC_Os06g46284;	10.8343	17.3424	12.7347	7.3002	8.16672	8.93258	0.00180997	-0.718072	down
513	Os02g0555700	LOC_Os02g35000;	17.3901	13.7707	15.083	18.5944	23.0578	26.5099	0.00273006	0.587829	up
514	Os02g0302500	LOC_Os02g19950;	4.87522	7.82374	6.15808	2.31813	3.04636	2.73295	0.000685592	-1.19177	down
515	Os06g0589750	--	28.7868	37.8682	43.075	17.8788	21.6049	27.1338	0.00360998	-0.693066	down
516	Os04g0530100	LOC_Os04g44780;	9.26934	7.7341	8.65506	11.9963	14.6347	13.8995	0.0001795	0.686899	up
517	Oryza_sativa_newGene_8566	--	1.21286	1.06038	1.30482	2.72427	2.78139	2.51876	0.00205421	1.19618	up
518	Os09g0491100	LOC_Os09g31430;	3.01385	7.61692	2.74829	1.27587	2.1673	2.47278	0.00942734	-1.34213	down
519	Os02g0629800	LOC_Os02g41904;	34.975	35.9465	32.5687	64.1901	76.0669	53.4636	7.4185e-08	0.932994	up
520	Os01g0221100	LOC_Os01g12160;	3.63385	7.91282	6.33331	1.63859	1.97237	3.41462	0.00027764	-1.35544	down
521	Os05g0476700	LOC_Os05g39930;	3.11071	8.19047	7.38327	2.08055	3.00747	2.8068	0.00361178	-1.22059	down
522	Os05g0209600	LOC_Os05g11910;	17.7512	20.3561	15.4547	9.65836	11.5182	13.5317	0.00678105	-0.598561	down
523	Os09g0339300	LOC_Os09g16980;	6.94305	6.87229	5.68655	2.37533	5.05468	2.95949	0.00529659	-0.891872	down
524	Os01g0279100	LOC_Os01g17170;	16.3455	15.8803	20.9	29.2324	25.885	27.3556	1.34669e-05	0.723142	up
525	Oryza_sativa_newGene_668	--	3.1691	2.26099	2.68389	1.04939	1.85283	1.77386	0.00784521	-0.824106	down
526	Os03g0337200	--	24.1169	24.3103	25.3471	13.6808	19.2252	14.5343	0.000245529	-0.626818	down
527	Os08g0416000	LOC_Os08g32080,LOC_Os08g32085;	8.08441	7.37602	8.20142	11.7564	10.7	12.1757	0.00114213	0.601156	up
528	Os05g0256500	LOC_Os05g16740;	4.80087	3.76252	3.92827	2.26409	2.44885	2.26204	0.00223642	-0.80698	down
529	Os02g0228900	LOC_Os02g13520;	3.49509	3.01691	3.06533	4.31862	6.83962	5.70737	0.00384234	0.838121	up
530	Os05g0422900	LOC_Os05g34914;	48.3745	50.7797	53.9743	28.0632	37.1896	31.6963	1.49184e-05	-0.633395	down
531	Os01g0646800	LOC_Os01g45880;	17.9158	19.7955	16.7639	7.68306	12.0917	9.6365	1.84424e-06	-0.866287	down
532	Os01g0364100	LOC_Os01g26174;	2.03823	3.11179	2.72768	0.437959	0.965908	0.952643	2.62115e-05	-1.71824	down
533	Oryza_sativa_newGene_5299	--	0.85607	0.611066	1.00757	3.51038	1.82954	2.18955	0.00114541	1.63711	up
534	Os04g0675400	LOC_Os04g57880;	16.0291	10.954	11.5894	3.45711	3.37989	6.3707	2.76438e-07	-1.51274	down
535	Oryza_sativa_newGene_6894	--	8.2285	8.48342	8.73062	5.80875	5.90963	5.1464	0.000248241	-0.662107	down
536	Oryza_sativa_newGene_908	--	3.74105	4.45014	3.95131	1.65584	3.20174	2.35285	0.00690054	-0.734042	down
537	Os09g0296800	LOC_Os09g12540;	3.15127	3.18323	3.63242	6.37378	6.10788	5.09809	0.00252848	0.850232	up
538	Os03g0114000	LOC_Os03g02290;	9.97958	8.29773	9.87513	11.4901	17.4397	12.7726	0.00602125	0.591245	up
539	Oryza_sativa_newGene_1614	--	32.3413	27.833	32.2279	14.9271	22.351	12.7451	9.13895e-06	-0.774546	down
540	Os03g0387900	LOC_Os03g27019;	57.2636	81.1279	80.8639	131.441	141.055	164.204	9.33128e-10	1.01198	up
541	Os04g0447950	--	3.3172	5.55307	6.48908	1.89885	1.7291	3.2497	0.00984085	-1.12668	down
542	Os12g0594200	LOC_Os12g40279;	1.6618	1.79834	1.83801	0.385331	1.12453	0.369061	0.00295829	-1.47816	down
543	Os03g0147550	--	1.40365	3.69747	2.34345	1.16297	0.496479	0.652629	0.00295182	-1.6342	down
544	Os03g0371000	LOC_Os03g25490;	67.3147	97.684	78.6079	44.746	40.7465	59.507	0.00101191	-0.717567	down
545	Os02g0106001	--	97.2502	63.0039	57.9707	102.898	100.825	119.619	0.0096234	0.601175	up
546	Os06g0628500	LOC_Os06g42310;	7.63165	8.74829	6.76269	4.05626	4.82402	2.84726	0.00021076	-0.950726	down
547	Os06g0553200	LOC_Os06g35970;	370.118	548.313	411.436	179.935	265.2	322.81	0.00129639	-0.769252	down
548	Os05g0500101	--	0.61761	0.723224	0.704704	0.062404	0.143399	0.129341	0.000929387	-2.55586	down
549	Os06g0614000	LOC_Os06g41090;	0.393952	0.229341	0.246687	0.922764	0.93237	0.852734	0.00235375	1.6722	up
550	Os03g0722500	LOC_Os03g51240;	16.5074	17.638	17.8143	24.936	20.478	30.7086	0.00129442	0.64895	up
551	Os02g0606200	LOC_Os02g39360;	2.85506	4.15325	3.62423	13.6044	11.8775	15.3842	2.35094e-17	1.97015	up
552	Os08g0431200	LOC_Os08g33430;	8.68638	12.0415	9.63338	4.14974	5.6144	6.8538	0.000738532	-0.844813	down
553	Os05g0586600	LOC_Os05g50930;	0.804764	1.22522	1.60696	4.74479	5.51677	6.93721	1.23765e-12	2.257	up
554	Os07g0543800	--	7.59602	6.79804	7.6689	4.12019	5.09762	3.40334	0.000292644	-0.775833	down
555	Os07g0173300	LOC_Os07g07690;	6.08201	7.18507	4.3336	1.60065	3.23607	2.36177	0.000313733	-1.27057	down
556	Os01g0251400	LOC_Os01g14850;	74.5088	53.6386	48.2102	128.672	127.626	106.129	3.48649e-08	1.07303	up
557	Os03g0407050	LOC_Os03g29340;	2.96227	4.68741	3.06569	1.33619	2.12239	1.7847	0.0030895	-1.01009	down
558	Oryza_sativa_newGene_8836	--	0	0	0	1.02203	1.09549	0.853372	4.62691e-09	8.71288	up
559	Os04g0506100	LOC_Os04g42700;	13.9205	11.2115	13.2733	17.5052	19.6735	20.6466	0.00953754	0.619924	up
560	Oryza_sativa_newGene_9227	--	8.93661	8.74637	9.17048	4.98059	5.29097	5.74602	3.53315e-05	-0.701482	down
561	Oryza_sativa_newGene_6200	--	0.217809	0.229703	0.258352	0.617052	1.20777	1.61058	3.97964e-08	2.22437	up
562	Oryza_sativa_newGene_4220	--	2.49147	2.32726	2.97187	1.01006	1.77035	1.09686	0.00165329	-1.16788	down
563	Oryza_sativa_newGene_7405	--	1.59696	2.06047	1.67155	0.827371	0.978886	0.941814	0.000863207	-0.953647	down
564	Os01g0253050	--	2.54465	4.27467	5.06198	1.1928	2.22311	0.861521	0.000805278	-1.45011	down
565	Oryza_sativa_newGene_295	--	4.95325	4.56116	5.12726	2.03589	3.1661	1.75517	0.000569962	-0.959108	down
566	Oryza_sativa_newGene_2075	--	4.0957	3.15357	4.48171	2.50468	5.80641	3.49208	0.00669096	-0.723607	down
567	Os08g0299600	LOC_Os08g20440;	2.30128	2.19047	3.71375	1.11962	1.50191	1.47108	0.0087479	-0.976711	down
568	Oryza_sativa_newGene_3147	--	2.33397	2.12962	1.91549	1.40421	1.04334	1.09443	0.00429013	-1.06193	down
569	Os02g0527200	LOC_Os02g32580;	1.50242	5.14658	3.60048	1.10709	0.487594	0.224525	0.000696172	-2.39794	down
570	Os09g0339800	LOC_Os09g17000;	14.5237	17.5158	10.8066	2.82585	5.18195	3.94007	1.78374e-12	-1.82082	down
571	Os03g0571900	LOC_Os03g37490;	16.3179	25.0509	20.1327	11.2363	9.81784	10.0204	8.2169e-06	-0.950771	down
572	Os03g0337550	--	9.28539	6.62913	9.78971	16.812	12.251	15.9943	0.00151481	0.8473	up
573	Os03g0782300	LOC_Os03g56940;	2029.05	1842.91	2142.43	3297.08	2233.79	3566.47	0.00260173	0.635156	up
574	Oryza_sativa_newGene_5636	--	6.32693	5.18495	5.75625	12.8526	8.82085	11.3877	0.00101191	0.974065	up
575	Os08g0178800	LOC_Os08g08120;	10.2778	9.84882	9.73876	22.7802	24.1243	33.02	1.76274e-16	1.49181	up
576	Os01g0599550	--	5.55567	5.04809	6.13957	3.13932	3.46937	2.53362	0.000216727	-0.840303	down
577	Os06g0113950	--	4.33763	5.81873	4.63433	0.763386	1.7342	0.866652	6.643e-12	-2.14513	down
578	Os02g0162766	LOC_Os02g06725;	5.1537	7.52683	4.60564	1.15477	3.46771	2.66429	0.00210755	-1.23574	down
579	Os04g0611300	LOC_Os04g52180;	35.9309	24.0558	28.2993	73.2569	47.8575	51.3253	5.08039e-05	1.00804	up
580	Os06g0142000	LOC_Os06g04970;	9.85665	10.8172	9.50661	5.53464	7.66468	5.34831	0.00751071	-0.676995	down
581	Os10g0323500	LOC_Os10g17650;	36.2881	32.5623	43.5246	73.826	40.7792	62.9088	0.00823426	0.702024	up
582	Os08g0456600	--	1.25419	0.993756	0.599712	3.40503	2.48648	2.36967	0.00791797	1.56779	up
583	Oryza_sativa_newGene_1710	--	2.94053	3.20937	3.94328	1.56554	1.89678	1.96528	0.000151032	-0.865857	down
584	Os01g0182600	LOC_Os01g08700;	285.699	237.812	259.775	148.892	176.576	156.284	4.33643e-09	-0.673267	down
585	Os03g0700600	--	28.6091	30.6745	24.9148	14.0405	16.0367	17.7567	2.16526e-05	-0.786241	down
586	Oryza_sativa_newGene_476	--	2.40121	1.76908	1.93741	1.01674	1.3619	0.947432	0.0019663	-0.82601	down
587	Os03g0184500	LOC_Os03g08620;	9.33489	8.70973	9.35591	16.4992	17.3803	12.1319	0.000470318	0.77994	up
588	Os02g0772100	--	2.2781	1.14612	2.08453	0.192485	0.182455	0.515774	4.14149e-05	-2.56116	down
589	Oryza_sativa_newGene_2119	--	3.27526	3.16304	3.09606	1.83423	1.97724	1.5099	0.000203149	-0.988944	down
590	Os07g0589200	LOC_Os07g40020;	1.10928	1.2701	1.04791	0.423176	0.496819	0.503716	0.00784766	-1.22329	down
591	Os05g0543600	LOC_Os05g46610;	4.76079	4.26156	4.85211	1.69909	2.3489	2.36275	0.000264633	-1.08555	down
592	Os08g0461600	--	2.74001	2.44369	3.16557	1.02316	1.83135	0.843992	0.00413665	-1.15151	down
593	Oryza_sativa_newGene_4757	--	24.473	25.0759	24.3248	14.2578	17.6761	15.4088	1.00859e-05	-0.629867	down
594	Oryza_sativa_newGene_6967	--	6.39447	5.03645	5.16627	2.89689	3.89387	3.05856	0.0026091	-0.725264	down
595	Os03g0345700	LOC_Os03g22490;	20.9263	22.385	25.0421	43.4815	25.556	37.2515	0.00987574	0.677785	up
596	Os09g0498200	--	2.02283	2.28035	1.61659	0.835994	1.0398	0.790661	0.00239628	-1.12282	down
597	Os12g0576600	LOC_Os12g38750;	14.2889	18.4249	15.4368	7.23428	8.43468	6.06071	3.51208e-09	-1.11288	down
598	Os01g0713900	LOC_Os01g51634;	4.30131	6.02526	4.02463	1.1685	2.34124	1.18024	3.89288e-05	-1.58976	down
599	Os07g0619600	LOC_Os07g42750;	6.96236	8.18189	5.03979	2.83033	4.21475	3.64318	0.00280321	-0.89273	down
600	Os08g0132700	--	6.17588	6.2861	5.51584	1.95748	3.28893	2.71743	2.5165e-05	-1.15174	down
601	Os03g0201800	LOC_Os03g10469;	37.8305	44.6594	59.7631	28.5724	24.2755	16.5426	9.69375e-05	-0.996256	down
602	Os04g0457500	LOC_Os04g38450;	50.995	63.384	46.1147	25.9369	34.0489	39.7301	0.00150616	-0.661198	down
603	Oryza_sativa_newGene_990	--	3.02433	3.0002	3.09623	1.36574	1.27697	1.41365	4.85643e-07	-1.25307	down
604	Os03g0436400	LOC_Os03g32170;	18.8248	26.6703	24.3039	5.38422	13.5277	6.58013	4.78259e-06	-1.43247	down
605	Os01g0822900	LOC_Os01g60740;	316.239	301.793	302.378	569.132	509.162	379.68	0.00013726	0.686072	up
606	Os05g0415600	--	4.28685	4.97692	4.68555	2.38208	3.31315	2.43747	0.000157491	-0.778711	down
607	Os02g0571100	LOC_Os02g36210;	2.40372	1.88495	2.6471	0.897694	0.771463	0.441729	0.00103599	-1.66012	down
608	Os09g0498500	LOC_Os09g32290;	29.344	40.3029	27.2526	13.0982	20.5477	19.2157	0.00033608	-0.852445	down
609	Os10g0158000	LOC_Os10g07004;	10.2629	10.1709	13.7016	5.25605	7.05208	5.44138	2.70391e-05	-0.916414	down
610	Os06g0252800	LOC_Os06g14220;	23.7548	23.3804	26.0876	35.7684	29.905	42.2419	0.00258366	0.593485	up
611	Os04g0445700	LOC_Os04g36800;	56.4793	53.2073	56.3778	78.9585	70.3417	101.838	0.000395244	0.629997	up
612	Os04g0430600	LOC_Os04g35130;	12.8518	12.6285	11.8644	19.92	17.0981	18.1691	0.000831396	0.598304	up
613	Os02g0743600	LOC_Os02g50980;	12.7275	20.4328	19.3219	10.3276	8.72128	6.24234	0.00258406	-1.01622	down
614	Os05g0100500	LOC_Os05g01020;	13.0199	18.7998	14.1307	3.96764	7.60477	7.27274	7.90945e-06	-1.26835	down
615	Os04g0227000	LOC_Os04g15650;	6.51829	11.1625	9.54943	3.45624	3.80301	4.26033	3.80755e-07	-1.21219	down
616	Os02g0520500	LOC_Os02g32080;	260.506	233.417	275.44	438.614	318.514	486.364	0.000213244	0.729677	up
617	Os09g0560000	LOC_Os09g38710;	4.6773	4.81374	3.15527	5.99376	8.56136	6.16054	0.00489992	0.736574	up
618	Oryza_sativa_newGene_9640	--	0.902247	0.724765	0.509	0.251758	0.028133	0.049917	0.00571379	-2.62669	down
619	Os10g0347000	LOC_Os10g20650;	6.47994	5.40821	5.54086	13.5446	14.4103	9.18862	1.77464e-06	1.12355	up
620	Os09g0462550	--	7.1865	7.25196	10.3165	5.85855	5.45629	4.09399	0.00970032	-0.649357	down
621	Os09g0426500	LOC_Os09g25810;	184.258	273.239	251.905	150.615	124.079	153.757	0.000526357	-0.694063	down
622	Os04g0422300	LOC_Os04g34490;	2.12601	13.1657	2.38937	0.378276	0.116277	0.202518	0.000186812	-4.55024	down
623	Os01g0775100	LOC_Os01g56780;	4.99868	7.19601	6.88829	12.4071	14.8836	18.1998	3.8045e-10	1.2789	up
624	Oryza_sativa_newGene_6333	--	4.22883	6.04575	9.58907	3.29003	3.82935	3.49853	0.00953754	-0.876873	down
625	Os01g0922100	LOC_Os01g69290;	3.40644	2.68061	2.61405	5.31689	5.61347	5.84124	8.52397e-05	0.977491	up
626	Os06g0493801	LOC_Os06g29800;	3.64326	3.91195	3.49805	1.31645	2.01878	2.15859	0.00113846	-0.987447	down
627	Oryza_sativa_newGene_10110	--	3.25647	4.71913	4.56718	2.59494	2.33724	1.97283	0.00678031	-0.871222	down
628	Os12g0621100	LOC_Os12g42610;	15.5343	12.6116	15.4495	20.25	23.2818	20.835	0.000470318	0.586384	up
629	Os02g0825301	LOC_Os02g57890;	8.7835	6.87819	6.92971	3.7358	4.38639	4.35762	0.000287376	-0.827497	down
630	Oryza_sativa_newGene_8749	--	2.09968	2.33083	1.89686	0.746663	0.90235	1.24865	0.00143025	-1.09674	down
631	Oryza_sativa_newGene_1757	--	1.46444	1.79504	1.01398	0.484073	0.659175	0.617099	0.00845066	-1.22436	down
632	Os09g0426600	--	2.43881	4.19129	3.93038	1.00914	1.26947	1.92034	0.00572448	-1.30133	down
633	Os11g0146200	LOC_Os11g04910;	32.5417	27.8635	33.731	20.8333	18.4795	19.9695	4.3103e-05	-0.614926	down
634	Os05g0579500	LOC_Os05g50330;	2.99821	2.71351	2.4375	5.20766	6.18123	4.51481	0.00969699	0.992959	up
635	Os04g0352400	LOC_Os04g28420;	6.4737	12.936	7.68884	2.9125	4.16399	2.20398	6.26471e-06	-1.52226	down
636	Oryza_sativa_newGene_6796	--	1.47014	1.86614	2.17055	1.07167	1.00831	0.557693	0.00565445	-1.02744	down
637	Os11g0104300	LOC_Os11g01330;	1.32858	1.70705	1.73947	0.532408	0.791819	0.711537	0.00643271	-1.20404	down
638	Os04g0535000	LOC_Os04g45240;	7.84619	7.46806	8.27246	3.44204	5.7294	3.99981	0.000171734	-0.818175	down
639	Oryza_sativa_newGene_1547	--	0.958583	0.936276	0.745699	0.355475	0.22628	0.277078	0.00933898	-1.41208	down
640	Oryza_sativa_newGene_7120	--	1.80415	1.07068	1.47779	0	0	0	2.73016e-09	-8.79411	down
641	Os01g0764900	LOC_Os01g55950;	25.4518	26.5947	21.6302	13.2907	15.3927	17.26	0.000216977	-0.652659	down
642	Os03g0139200	LOC_Os03g04600;	28.3096	37.7393	25.8368	14.0588	17.684	20.899	0.00013726	-0.776737	down
643	Os12g0566000	LOC_Os12g37840;	206.924	335.091	235.43	166.846	136.516	163.799	0.00109308	-0.708525	down
644	Os02g0703600	LOC_Os02g47470;	2.29049	5.19105	5.04377	1.42907	1.8688	1.42726	0.000305095	-1.37838	down
645	Os04g0402200	LOC_Os04g32960;	18.7563	23.3455	21.8565	12.2495	14.7622	13.8673	5.52647e-05	-0.618611	down
646	Os02g0518500	LOC_Os02g31890;	2.30948	3.13327	2.13902	0.98804	1.11687	0.879897	0.00127686	-1.29345	down
647	Os11g0128300	LOC_Os11g03420;	14.6575	11.8239	10.6855	27.9182	15.0681	27.2166	0.00278215	0.959039	up
648	Os05g0148000	LOC_Os05g05530;	34.6725	33.898	32.9296	18.2972	25.9205	20.7779	3.50738e-05	-0.610017	down
649	Os08g0542300	LOC_Os08g42940;	7.98282	5.65954	8.45779	12.8403	14.2874	11.4813	0.00165075	0.833444	up
650	Os01g0756900	LOC_Os01g55220;	7.22983	4.81414	5.63773	11.2331	10.4067	11.64	0.00141551	0.948487	up
651	Os12g0235600	LOC_Os12g13295;	12.1737	13.2685	13.132	5.1566	8.24001	6.75103	1.97595e-05	-0.915428	down
652	Oryza_sativa_newGene_1299	--	4.22813	4.31788	4.37092	0.274823	0.370185	0.22805	7.00158e-20	-3.76215	down
653	Os06g0228800	LOC_Os06g12350;	13.2546	14.6386	15.4233	27.7332	18.5546	20.3363	0.00464604	0.660553	up
654	Os06g0318600	LOC_Os06g21380;	9.23564	9.96796	12.1053	16.0622	14.7175	16.44	0.00104403	0.625294	up
655	Os04g0223500	LOC_Os04g14690;	77.2927	133.989	92.8547	64.727	49.7641	66.6195	0.00123426	-0.771483	down
656	Os01g0281100	LOC_Os01g17396;	2.67013	4.03958	4.55933	20.0862	16.6054	33.5391	1.26044e-21	2.66879	up
657	Os05g0575000	LOC_Os05g49940;	12.2087	9.81399	11.3657	24.6479	14.1164	20.5197	0.00679979	0.871111	up
658	Os03g0761000	LOC_Os03g55310;	17.7685	11.1596	13.3433	25.1919	24.706	24.3611	0.000246232	0.847524	up
659	Os05g0126400	LOC_Os05g03550;	30.6014	36.0282	28.5906	11.6617	24.0348	19.8062	0.00247949	-0.760541	down
660	Os01g0934500	--	18.0193	17.3986	18.5688	9.12678	14.0192	10.9818	5.63507e-05	-0.712178	down
661	Os05g0169500	--	2.13842	2.67625	1.66564	0.91177	1.49206	1.19316	0.00721456	-0.82895	down
662	Os03g0766800	LOC_Os03g55776;	26.904	81.2419	46.2219	14.324	17.0027	17.4591	0.00666056	-1.63736	down
663	Os12g0293000	--	4.25314	4.87604	4.10396	2.25736	2.68778	1.97745	0.000124864	-0.914187	down
664	Os05g0290400	--	12.2266	12.5878	11.7846	5.77376	8.68362	7.52869	0.000139026	-0.712115	down
665	Os12g0429950	--	27.3655	18.7976	24.2323	37.2934	32.3763	41.0011	0.00450049	0.688558	up
666	Os11g0151700	LOC_Os11g05400;	1.49944	1.48039	1.82563	3.03492	3.29327	3.54227	0.000292136	1.06686	up
667	Os12g0442800	LOC_Os12g25630;	17.3213	19.4033	17.3084	9.21604	10.2679	11.3583	3.57455e-06	-0.779226	down
668	Os07g0204900	LOC_Os07g10490;	35.8164	33.8998	33.8048	45.123	45.5851	63.8901	0.00114541	0.602214	up
669	Oryza_sativa_newGene_2815	--	0.108897	0	0.079951	0.740608	0.618438	0.380566	0.000313733	3.22325	up
670	Os11g0282700	LOC_Os11g17954;	3.49396	3.23009	2.69275	1.12615	1.33423	1.16448	3.37574e-05	-1.34026	down
671	Os04g0690800	LOC_Os04g59440;	8.57105	11.9365	9.71087	4.61882	4.90844	7.33479	0.0084744	-0.812596	down
672	Os12g0433700	LOC_Os12g24580;	17.2927	18.4434	19.1439	30.4604	24.6393	36.6989	0.00083272	0.776165	up
673	Os02g0160500	--	10.704	11.5359	13.1344	26.9067	18.6533	16.286	0.00464738	0.844162	up
674	Os09g0322600	LOC_Os09g15389;	9.28715	8.62676	9.29147	5.423	6.15085	5.14884	2.5165e-05	-0.681125	down
675	Oryza_sativa_newGene_7227	--	10.1686	9.3579	10.6768	5.1576	6.70386	6.24109	1.21975e-05	-0.711463	down
676	Os12g0161500	LOC_Os12g06440;	6.17302	5.74616	6.08013	2.11141	3.40048	2.66274	2.61277e-06	-1.1144	down
677	Os06g0270200	LOC_Os06g15910;	13.3183	16.1405	14.9557	8.23188	8.63865	11.7509	0.00448296	-0.60433	down
678	Os07g0549300	--	11.9562	12.8886	11.7433	5.8163	8.00756	7.9045	4.27025e-05	-0.726739	down
679	Os07g0123601	--	8.80347	6.82043	8.41132	12.6316	12.1035	11.9988	0.000199973	0.645818	up
680	Os03g0195400	--	4.69046	5.08221	3.74346	2.34057	2.56188	1.46659	0.00301139	-1.0473	down
681	Os03g0265900	LOC_Os03g15920;	143.32	141.224	116.358	73.9375	61.2541	66.1758	6.00911e-10	-0.957286	down
682	Os07g0438500	LOC_Os07g25680;	11.7403	15.3727	11.2495	5.15215	8.59806	8.05319	0.000997348	-0.794555	down
683	Os03g0573500	LOC_Os03g37720;	0.725592	1.06255	0.914339	0.162886	0.399856	0.192733	0.000276289	-1.80343	down
684	Os01g0502900	--	14.7639	13.816	17.4924	4.56257	9.64861	8.35359	0.00855361	-1.01032	down
685	Os03g0607200	LOC_Os03g41060;	44.5718	38.3095	44.6622	91.1371	80.3354	69.9632	4.98744e-09	0.955944	up
686	Os02g0165200	--	2.97099	4.60383	4.11896	1.65007	2.15634	2.02481	9.03766e-05	-0.977923	down
687	Os07g0671800	LOC_Os07g47510;	70.2466	78.6455	82.0349	122.307	121.376	106.26	6.06159e-06	0.63142	up
688	Os01g0372350	--	7.53328	8.02535	8.96049	4.63893	5.53391	4.5872	0.000778835	-0.702548	down
689	Os04g0497300	LOC_Os04g41980;	39.9155	36.8045	40.8966	75.8652	53.4267	77.3989	5.08039e-05	0.851412	up
690	Os02g0136966	--	0.93055	1.74759	1.12786	0.419829	0.503559	0.661659	0.00300153	-1.2348	down
691	Os06g0102100	LOC_Os06g01250;	23.8903	39.9915	28.855	13.6802	17.0984	23.8845	0.00891956	-0.737619	down
692	Os06g0506150	--	6.3973	7.21746	6.10944	2.99197	5.17184	4.29668	0.00709425	-0.641231	down
693	Os06g0274500	LOC_Os06g16330;	9.55366	8.90859	10.1644	14.7372	14.9288	20.4139	8.33545e-06	0.837531	up
694	Oryza_sativa_newGene_4687	--	2.12015	2.78961	1.97885	1.10929	0.935956	0.409486	0.00535499	-1.34866	down
695	Os08g0308700	LOC_Os08g21700;	4.68581	4.66245	4.71	8.00981	7.28845	7.26763	0.00958268	0.71718	up
696	Oryza_sativa_newGene_4534	--	2.24462	2.22063	2.38977	1.01138	1.49179	0.98808	0.00120336	-0.948662	down
697	Os08g0113600	--	1.4165	2.15983	1.29148	4.50338	3.43438	4.05642	0.00109502	1.33247	up
698	Os01g0852400	LOC_Os01g63310;	2.98024	2.34464	2.65486	4.32446	5.78684	4.20826	0.000790396	0.868765	up
699	Os01g0823100	LOC_Os01g60770;	72.6612	63.7966	52.5924	22.5045	36.6234	44.9591	0.00105729	-0.837555	down
700	Os07g0669800	LOC_Os07g47360;	6.15376	8.17893	5.88025	2.23814	4.96773	3.98176	0.00841578	-0.838148	down
701	Os02g0486400	--	9.49234	10.7129	10.8695	2.83419	6.30053	4.95	0.000183108	-1.12505	down
702	Os09g0442100	LOC_Os09g27010;	2.09823	2.74788	2.36191	1.35798	0.785717	1.15917	0.0098484	-1.0795	down
703	Os06g0235300	LOC_Os06g12876;	5.14703	7.02641	6.08664	2.61744	4.473	3.70002	0.00500616	-0.738143	down
704	Oryza_sativa_newGene_2891	--	50.5177	50.1155	51.2027	26.1118	36.4457	31.9445	3.46913e-06	-0.656194	down
705	Oryza_sativa_newGene_6736	--	12.5667	11.872	12.2544	6.59301	9.85957	6.77791	0.0017126	-0.630706	down
706	Oryza_sativa_newGene_9296	--	29.5239	29.8122	32.4715	22.3476	17.8054	15.1884	0.000546274	-0.683772	down
707	Os03g0251600	LOC_Os03g14700;	7.48184	9.8497	10.7945	4.20581	6.58396	5.93151	0.00845066	-0.726065	down
708	Os06g0361500	--	7.19567	8.26755	7.89891	3.91529	5.93566	5.03067	0.000744887	-0.627787	down
709	Os01g0627500	LOC_Os01g43710;	33.5662	41.0576	36.413	22.4849	21.7886	22.8812	1.86467e-06	-0.693675	down
710	Os06g0560700	LOC_Os06g36520;	7.70229	7.57684	7.27138	13.8733	13.3359	8.91348	0.00577722	0.714237	up
711	Os08g0485000	LOC_Os08g37840;	25.7099	20.0778	22.0263	53.4477	38.8699	39.7069	1.43776e-06	1.00087	up
712	Os05g0492600	LOC_Os05g41310;	2.40382	2.26134	1.88586	0.667939	0.65293	0.712532	2.06165e-10	-1.65061	down
713	Os11g0470966	--	6.18813	6.13224	6.27379	3.38029	4.44821	3.23886	0.000391475	-0.721147	down
714	Os06g0146200	LOC_Os06g05368;	8.53313	9.13687	8.31969	4.56055	6.23996	4.51616	5.32057e-05	-0.736721	down
715	Os05g0393800	LOC_Os05g32720;	5.54646	6.76518	6.63145	4.12963	3.57271	3.95066	0.001958	-0.665536	down
716	Os04g0555600	LOC_Os04g46894;	2.77723	4.27503	2.71923	0.878012	2.16738	1.57505	0.00515857	-1.06621	down
717	Os03g0426350	--	21.768	18.9939	21.0551	32.6624	28.5514	29.8726	0.000676584	0.593965	up
718	Oryza_sativa_newGene_6437	--	4.33767	4.33153	3.83442	4.10405	2.71036	2.69133	0.000465409	-0.820476	down
719	Os11g0615900	LOC_Os11g40160;	5.87955	7.9768	5.9616	2.32212	4.27811	2.63455	0.000250134	-1.08204	down
720	Os10g0469600	LOC_Os10g33130;	2.55229	1.89775	1.86739	0.845964	1.11948	1.11034	0.000302438	-1.00805	down
721	Os03g0203700	LOC_Os03g10640;	6.82109	9.40949	11.1173	4.74582	5.87875	4.63387	0.000774911	-0.796003	down
722	Os01g0702000	LOC_Os01g50622;	27.8456	26.8487	20.5307	14.6613	13.4824	14.4474	3.4124e-05	-0.785816	down
723	Oryza_sativa_newGene_8021	--	1.69754	2.39086	1.70466	0.7547	1.22722	0.729763	0.00378673	-1.05394	down
724	Os10g0389500	LOC_Os10g25060;	44.7472	27.5065	34.1106	12.6345	8.09922	18.3797	0.00602509	-1.40386	down
725	Oryza_sativa_newGene_2890	--	2.17042	2.44403	2.93754	1.06105	1.07778	1.28432	7.35916e-05	-1.15371	down
726	Oryza_sativa_newGene_3181	--	1.38205	2.38339	2.06296	0.597796	0.292864	0.471178	0.000177818	-2.03502	down
727	Os07g0575900	LOC_Os07g38840;	5.7623	4.78571	6.75439	10.8695	7.65009	11.2576	0.00142378	0.821539	up
728	Os09g0286600	LOC_Os09g11460;	23.8321	31.1587	28.1737	50.5372	39.6652	41.8073	0.00122103	0.65252	up
729	Os01g0842500	LOC_Os01g62490;	18.0714	22.9559	17.4639	5.972	11.7777	12.6295	0.00114545	-0.926314	down
730	Os03g0423300	LOC_Os03g30950;	14.6846	13.0271	13.6135	26.3126	19.1909	24.4184	5.67333e-05	0.797357	up
731	Os01g0919400	LOC_Os01g69030;	29.2435	53.783	36.31	10.2014	18.4843	14.7016	1.966e-05	-1.44041	down
732	Os02g0478050	LOC_Os02g27674;	9.30518	9.51275	9.99452	4.62774	7.15987	6.00629	0.000407683	-0.671771	down
733	Os06g0612900	LOC_Os06g41020;	9.15748	7.50258	6.30274	12.8923	13.6128	13.8018	0.00295829	0.840439	up
734	Os10g0416800	LOC_Os10g28120;	72.7721	53.1447	72.5117	145.362	105.508	101.623	4.77897e-05	0.868798	up
735	Os04g0227100	LOC_Os04g15680;	12.8655	13.4165	13.6855	7.36891	10.4683	7.62972	0.000255994	-0.625091	down
736	Oryza_sativa_newGene_5669	--	3.07795	2.59992	2.19079	0.889649	1.12732	1.27934	0.000160426	-1.22668	down
737	Os07g0147800	LOC_Os07g05390;	5.75169	6.9657	5.32605	2.57144	3.752	4.08488	0.00417648	-0.77186	down
738	Os07g0492500	LOC_Os07g31010;	2.6345	2.09568	2.8383	1.18987	1.4727	1.20826	0.000805278	-0.93854	down
739	Os04g0349401	LOC_Os04g28170;	10.5971	11.6315	11.4078	5.61712	6.99867	6.92812	7.61626e-06	-0.757043	down
740	Os10g0342300	LOC_Os10g20160;	0.830531	2.12304	1.01463	0.07581	0.541432	0.362593	0.00669351	-2.01863	down
741	Os05g0319800	LOC_Os05g25550;	53.4093	57.7706	77.8484	50.7522	45.1571	41.1716	0.00260173	-0.619178	down
742	Os08g0464400	LOC_Os08g36170;	8.0053	7.80527	7.06212	12.6443	11.0243	11.7935	0.00171843	0.667047	up
743	Os06g0684500	LOC_Os06g47040;	24.9303	32.9336	42.0567	14.425	13.8525	14.3651	2.00802e-08	-1.1961	down
744	Os02g0798800	LOC_Os02g55540;	15.5555	15.4377	16.0497	9.22441	9.15174	10.877	0.00189295	-0.65308	down
745	Os09g0548200	LOC_Os09g37600;	10.5827	7.18637	9.13693	12.8138	13.7968	14.1099	0.00428153	0.628991	up
746	Os11g0104350	LOC_Os11g01330;	20.8885	21.953	20.3196	32.9749	31.3987	35.732	0.000385694	0.696528	up
747	Os08g0426866	LOC_Os08g33050;	2.09583	2.24244	2.52496	3.38238	4.08743	4.93521	0.00567141	0.880143	up
748	Oryza_sativa_newGene_2293	--	3.24159	3.89223	3.71245	1.9244	1.8987	1.66016	0.000373186	-0.870132	down
749	Os08g0505900	LOC_Os08g39550;	15.0616	10.6936	17.5556	26.2161	21.415	25.0446	0.000830854	0.78348	up
750	Os04g0526200	--	2.32512	2.15957	2.14273	1.34622	1.26747	0.922519	0.00624168	-0.866275	down
751	Oryza_sativa_newGene_3854	--	11.9548	18.7021	20.7425	7.8532	7.75339	5.6837	5.16264e-08	-1.13369	down
752	Os11g0689500	LOC_Os11g46250;	1.16401	2.09184	1.60449	0.244668	0.901692	0.436432	0.00954594	-1.60011	down
753	Os03g0389601	--	0.653617	1.40192	1.17074	0.334831	0.27189	0.09247	0.00512817	-2.10171	down
754	Os03g0176700	LOC_Os03g07960;	4.78561	5.46306	5.78934	17.4747	14.8174	15.2531	2.32859e-12	1.59947	up
755	Os02g0580400	LOC_Os02g36990;	2.46125	2.10219	1.48382	3.75299	5.29943	3.87997	0.00300153	1.12089	up
756	Os06g0647900	LOC_Os06g43960;	17.9954	17.8767	14.5876	6.83314	7.27154	8.2588	4.42638e-10	-1.14304	down
757	Os02g0745200	LOC_Os02g51119;	17.5238	14.3863	14.5481	8.77201	10.2363	10.2896	0.000316859	-0.587851	down
758	Os01g0186900	LOC_Os01g09220;	1.49582	11.8115	10.0414	0.798188	0.174746	0.2555	0.00129442	-4.16196	down
759	Os12g0568900	LOC_Os12g38120;	2.7148	2.69827	2.24122	4.71496	5.47461	5.19007	0.00070365	1.03216	up
760	Oryza_sativa_newGene_10386	--	2.65491	2.89092	2.40591	1.76899	1.97224	1.97051	0.00744015	-0.637875	down
761	Oryza_sativa_newGene_9450	--	3.91496	5.8078	3.35778	0.788744	1.60067	1.81886	2.50977e-07	-1.61827	down
762	Os07g0408400	LOC_Os07g22570;	11.666	9.08294	11.6871	6.95302	7.66139	5.80474	0.00799522	-0.634123	down
763	Os07g0673000	LOC_Os07g47570;	8.8267	8.04365	8.18275	13.9395	10.5951	13.3221	0.00523612	0.633813	up
764	Os12g0265600	--	6.59746	7.4242	8.12536	2.92363	4.7329	3.18298	0.00271306	-1.00464	down
765	Os02g0265900	LOC_Os02g16620;	120.966	118.838	115.973	211.196	137.925	175.908	0.00400371	0.596063	up
766	Os06g0654900	LOC_Os06g44450;	19.9604	23.3017	18.3214	50.4543	33.3682	52.7864	1.24346e-06	1.18725	up
767	Os08g0546100	LOC_Os08g43270;	27.5899	33.7646	23.854	15.8956	17.5339	21.1558	0.00397949	-0.613601	down
768	Os03g0711525	--	6.82351	8.61326	6.60065	2.82673	4.65277	5.00024	0.00351949	-0.798372	down
769	Os04g0469800	LOC_Os04g39430;	5.42912	5.88828	5.00459	9.4953	6.31861	10.6085	0.00951818	0.714409	up
770	Os02g0581100	LOC_Os02g37060;	2.43105	3.88625	2.70463	7.41095	5.30728	6.51179	0.00744015	1.13129	up
771	Os08g0389700	LOC_Os08g30020;	22.7298	25.9292	25.21	15.8277	11.8545	15.099	0.000101277	-0.744332	down
772	Os04g0419900	LOC_Os04g34270;	1.04926	1.59294	1.28844	0.633953	0.485074	0.535015	0.00632407	-1.19399	down
773	Os01g0789100	LOC_Os01g57930;	8.12262	7.48244	8.09631	12.5531	12.526	11.8277	7.25878e-05	0.671958	up
774	Os01g0971800	LOC_Os01g74020;	9.49402	4.40281	7.91416	1.84954	1.10596	4.02848	0.00196024	-1.6069	down
775	Oryza_sativa_newGene_4583	--	5.36113	2.53731	2.93659	1.20122	1.24581	1.42557	1.30428e-05	-1.44637	down
776	Os01g0149500	LOC_Os01g05620;	2.4166	2.75509	2.6345	0.866207	1.80341	1.35672	0.00583735	-0.93377	down
777	Oryza_sativa_newGene_9911	--	1.45053	1.00969	2.09408	0.599575	0.505926	0.457911	0.000575348	-1.27013	down
778	Os06g0285400	LOC_Os06g17490;	3.45474	3.4027	3.55919	5.14305	7.22806	4.6556	0.0018523	0.724949	up
779	Os06g0706400	LOC_Os06g49250;	12.3629	12.6821	12.9402	8.3985	7.66168	7.41044	4.12794e-05	-0.659603	down
780	Os01g0229700	LOC_Os01g12930;	2.18407	2.50684	3.08962	0.700532	1.35989	0.949827	0.00196758	-1.34503	down
781	Os07g0676800	LOC_Os07g47970;	19.5066	14.2514	14.687	23.0137	25.7303	22.441	0.00172812	0.586342	up
782	Os01g0701700	LOC_Os01g50610;	11.2511	8.99733	10.6928	15.2062	12.4537	22.8121	0.00970227	0.740063	up
783	Oryza_sativa_newGene_9781	--	6.75062	8.8782	9.29334	3.46805	6.02561	4.96882	0.00739551	-0.766578	down
784	Os05g0264200	LOC_Os05g17990;	2.08602	1.97992	2.37872	0.877674	0.84626	0.631649	0.000652663	-1.40628	down
785	Os12g0568750	--	3.16798	7.10054	5.43283	0.804274	2.13401	2.19661	0.000275079	-1.60029	down
786	Oryza_sativa_newGene_634	--	4.1531	4.43049	5.17025	1.91945	2.14014	3.07765	0.000362628	-0.947308	down
787	Os06g0504450	LOC_Os06g30830;	4.76077	4.91923	4.21142	3.04906	3.03367	2.86341	0.00536464	-0.60175	down
788	Os10g0330400	LOC_Os10g18370;	1.15726	1.30562	1.45667	5.43017	1.84346	6.69022	0.000471732	1.872	up
789	Os09g0425900	LOC_Os09g25760;	6.05674	11.0504	10.2387	4.11886	3.29175	3.12013	2.30034e-06	-1.65985	down
790	Oryza_sativa_newGene_1010	--	4.74782	5.67408	4.06134	2.68589	2.92742	2.40004	0.00068951	-0.823136	down
791	Os03g0593700	LOC_Os03g39655;	28.5838	29.8303	30.9042	16.0711	22.5188	18.452	0.000163167	-0.621989	down
792	Os10g0536450	--	5.71101	5.75087	6.28792	2.37263	1.79198	3.18775	0.00464224	-1.22453	down
793	Os02g0639500	LOC_Os02g42650;	3.09945	2.71517	3.16445	5.03238	6.12857	5.12127	0.000913075	0.884943	up
794	Os01g0612800	LOC_Os01g42720;	12.8755	12.1915	10.4419	17.757	19.4836	17.5619	0.00386645	0.655474	up
795	Os11g0216300	LOC_Os11g11000;	14.734	13.2261	15.4825	21.352	19.0599	25.8378	0.00037544	0.63955	up
796	Os02g0197400	LOC_Os02g10370;	24.4867	24.9186	25.1266	48.2534	33.6642	34.264	0.00629871	0.679757	up
797	Os02g0301100	LOC_Os02g19820;	62.2454	57.157	74.5131	100.054	93.3595	122.833	2.16526e-05	0.738207	up
798	Os04g0518200	LOC_Os04g43770;	22.621	24.5024	22.2104	11.1831	17.1462	14.1337	3.70955e-05	-0.709148	down
799	Os12g0490000	LOC_Os12g30610;	5.34937	7.17163	5.64748	2.9471	3.31467	3.87778	0.00271061	-0.814599	down
800	Os02g0574500	LOC_Os02g36490;	8.45899	12.7517	9.85522	16.725	19.7765	18.1022	0.000626034	0.790915	up
801	Oryza_sativa_newGene_9144	--	3.99802	1.98427	1.8793	0.024718	0	0	1.55592e-15	-8.06859	down
802	Os04g0604300	LOC_Os04g51460;	6.90607	10.0617	5.83283	3.65087	3.35821	3.92766	0.00203636	-1.02346	down
803	Os04g0488500	LOC_Os04g41140;	10.7925	11.7919	11.02	5.87287	8.18386	7.83255	0.00126278	-0.593376	down
804	Os01g0590100	LOC_Os01g40740;	6.36469	6.84695	5.99721	2.2498	3.04915	3.00302	0.000305095	-1.18797	down
805	Os06g0133000	LOC_Os06g04200;	97.1726	91.0373	146.823	76.3534	69.7093	54.6508	0.00278215	-0.70469	down
806	Os08g0520550	LOC_Os08g40900;	19.6789	28.9997	18.3142	7.23705	14.2949	14.9507	0.00594216	-0.858376	down
807	Os02g0810900	LOC_Os02g56600;	4.64966	3.71146	4.63715	9.24493	6.42912	6.20362	0.00596603	0.804974	up
808	Os03g0178066	--	5.82632	5.59483	5.90692	8.77679	9.58164	11.4563	8.24628e-05	0.812182	up
809	Os03g0144100	--	11.4671	12.9337	13.7632	5.84791	7.04598	4.31512	0.000331195	-1.11459	down
810	Os01g0974400	LOC_Os01g74320;	2.23914	1.92101	1.78039	3.9693	3.11228	3.99102	0.00273006	0.933539	up
811	Os05g0542500	LOC_Os05g46480;	11.4056	18.8676	20.0441	24.2446	31.8407	43.5724	0.000660466	1.00734	up
812	Oryza_sativa_newGene_2019	--	4.28382	4.67348	2.48813	1.42979	1.75757	2.17204	0.00494296	-1.06511	down
813	Os02g0477100	LOC_Os02g27592;	6.88159	6.89987	9.42194	3.2407	3.71635	3.25098	7.53699e-07	-1.15709	down
814	Os03g0298300	LOC_Os03g18680;	16.2275	12.5128	13.078	22.505	17.8492	24.7768	0.00338421	0.671949	up
815	Os04g0218600	--	2.97484	5.93217	4.02976	0.893476	2.52453	1.89186	0.00216522	-1.38037	down
816	Os06g0594700	--	0.430711	0.833332	0.601087	1.18615	2.20073	1.42127	0.00262152	1.37732	up
817	Os11g0271000	LOC_Os11g17070;	9.95814	11.7192	12.3918	4.98268	8.09127	5.91403	0.0019663	-0.798244	down
818	Os10g0100300	LOC_Os10g01044;	7.86101	8.25172	7.73078	4.39939	5.44756	5.43646	0.00322483	-0.615488	down
819	Os02g0597700	LOC_Os02g38410;	6.34009	4.82773	5.45443	10.4385	11.1719	8.87566	0.000701795	0.907245	up
820	Os01g0632700	--	9.83697	10.145	11.8931	6.21756	7.34619	9.3905	0.00389414	-0.628741	down
821	Os03g0331700	LOC_Os03g21380;	10.1282	9.15136	9.36375	19.124	11.3876	18.1635	0.00145787	0.805674	up
822	Os07g0434100	--	9.14748	11.5718	9.95066	5.21058	7.75479	6.08042	0.00115823	-0.663835	down
823	Os11g0523700	LOC_Os11g32100;	1.56326	1.4197	1.38635	3.06584	3.23032	2.83376	8.91103e-05	1.09767	up
824	Os06g0472000	LOC_Os06g27760;	8.82719	8.20483	8.57453	16.7978	15.8963	12.6229	0.000163598	0.862061	up
825	Os06g0722300	LOC_Os06g50679;	30.4145	33.0399	31.8819	14.7984	20.3448	16.8971	4.95322e-10	-0.848432	down
826	Os03g0736500	LOC_Os03g52650;	9.18386	6.10285	5.98768	11.9085	14.258	11.2424	0.00108288	0.843409	up
827	Os06g0256900	LOC_Os06g14540;	16.2427	20.8673	14.6505	6.39879	13.0118	10.3595	0.00630415	-0.779748	down
828	Os03g0353600	LOC_Os03g23030;	8.50123	11.2538	12.042	4.30806	6.4519	6.12035	0.000343749	-0.891217	down
829	Os01g0191400	--	2.67259	3.92247	3.95459	1.66718	1.61517	1.96755	0.000684173	-0.975536	down
830	Os09g0538500	LOC_Os09g36740;	3.08825	2.73984	2.59555	4.13712	5.04659	4.75529	0.00171843	0.754152	up
831	Os08g0260400	LOC_Os08g16030;	6.59511	3.98963	5.34345	11.5979	8.45314	8.99538	0.00326199	0.905832	up
832	Os11g0517800	LOC_Os11g31705;	18.1803	21.4771	16.631	6.37053	12.4184	12.7702	0.00370629	-0.815017	down
833	Os05g0210100	LOC_Os05g11950;	120.551	166.766	135.871	74.3015	92.1976	102.325	0.000707197	-0.628513	down
834	Os04g0219000	--	16.1528	18.0536	17.0519	10.1112	12.4737	12.0326	0.00023355	-0.613665	down
835	Os07g0645200	LOC_Os07g45074;	3.97296	5.93924	2.61853	0.814844	2.12519	2.16946	0.0083614	-1.27719	down
836	Os01g0855000	--	70.0767	88.9715	72.1159	34.303	47.519	44.6153	2.78349e-05	-0.695359	down
837	Os04g0568800	LOC_Os04g48040;	3.70457	3.75509	3.91112	1.00081	2.61766	1.88472	0.00532216	-1.0306	down
838	Os07g0483500	LOC_Os07g30020;	19.8838	27.5364	25.1497	13.0417	14.0005	15.9459	4.8125e-05	-0.725317	down
839	Os03g0212300	LOC_Os03g11370;	55.2256	42.9594	45.1364	77.1097	73.4629	69.8412	1.72414e-05	0.655051	up
840	Os11g0104150	--	8.77691	10.4882	10.3664	3.75857	5.25432	5.36668	8.78267e-08	-1.01875	down
841	Os05g0163250	LOC_Os05g07050;	2.09468	4.18784	2.27763	0.766699	1.6108	0.865748	0.00449215	-1.37769	down
842	Os12g0468000	LOC_Os12g28177;	2.88542	3.8695	2.59898	1.23425	1.25481	2.07684	0.00799512	-1.11554	down
843	Os07g0281900	--	0	0	0	0.671362	1.14393	2.21972	1.08016e-08	8.80332	up
844	Oryza_sativa_newGene_2335	--	1.59474	2.00436	2.29651	0.474524	0.274555	0.277235	1.19735e-06	-2.417	down
845	Os02g0828100	LOC_Os02g58160;	5.76317	7.99253	5.21998	3.26893	3.05505	4.00799	0.00580139	-0.843672	down
846	Os02g0681200	LOC_Os02g45710;	0.827194	6.2968	3.71894	0.93142	0.443141	0.936985	0.00464117	-2.17721	down
847	Os10g0125700	--	1.20426	2.06587	1.13808	0.702051	0.76824	0.370995	0.00648872	-1.22682	down
848	Os07g0633000	LOC_Os07g43925;	1.58014	2.02381	2.37639	4.75801	4.62481	5.71391	1.72414e-05	1.36213	up
849	Os08g0116700	LOC_Os08g02354;	1.893	2.22225	1.49063	0.276514	1.0595	0.664444	0.00281298	-1.4747	down
850	Os01g0839900	LOC_Os01g62260;	30.3133	21.5095	23.6953	41.9393	48.7934	39.0535	1.19319e-05	0.811769	up
851	Os06g0707100	LOC_Os06g49310;	5.09171	4.28249	4.98635	2.89526	3.17301	2.99012	0.00114987	-0.632899	down
852	Oryza_sativa_newGene_294	--	9.23702	10.6804	8.83769	4.89256	4.74906	4.3441	7.217e-10	-1.00616	down
853	Oryza_sativa_newGene_1464	--	2.27596	2.97759	2.72948	1.21453	2.01184	1.06408	0.00700981	-0.919135	down
854	Os10g0482450	LOC_Os10g34130;	2.37548	3.20849	2.82223	1.03102	1.27354	1.65526	0.00888823	-1.05752	down
855	Os04g0270200	LOC_Os04g20230;	18.2091	17.3452	14.6257	28.2851	24.2943	23.8109	0.00142738	0.642139	up
856	Os07g0509800	LOC_Os07g32570;	6.4594	9.15939	7.12695	14.1436	8.59121	15.8768	0.00860203	0.801086	up
857	Os03g0411900	LOC_Os03g29864;	3.03988	2.69752	3.41834	1.6819	1.77	1.24921	0.00643271	-0.923567	down
858	Os01g0603800	LOC_Os01g41930;	0.62678	0.758166	0.952438	0.035876	0.061256	0.183433	5.78833e-06	-2.97616	down
859	Os01g0228400	LOC_Os01g12810;	2.57227	3.65807	3.55352	9.9184	8.11948	11.1668	3.09657e-13	1.60906	up
860	Os03g0784600	LOC_Os03g57110;	4.18941	6.5234	5.04009	2.25931	3.01993	3.39784	0.00901434	-0.838516	down
861	Os02g0118875	LOC_Os02g02670;	7.58651	7.93532	7.36638	1.19626	3.42924	2.66304	0.000543994	-1.62825	down
862	Os05g0214100	LOC_Os05g12300;	53.798	52.4588	51.2584	31.9967	37.8153	29.9839	1.49744e-06	-0.598819	down
863	Os12g0169000	LOC_Os12g07150;	18.2102	23.7274	15.6761	9.38691	13.3036	10.8425	0.0007219	-0.756987	down
864	Os01g0913000	LOC_Os01g68480;	12.3606	14.2729	13.5412	23.6087	18.7784	26.3635	0.000225776	0.809328	up
865	Os05g0456925	LOC_Os05g38270;	5.70227	8.18161	9.66189	19.0813	19.117	27.3423	5.00465e-10	1.50499	up
866	Os09g0482660	LOC_Os09g30458;	1.20304	1.09642	1.36373	1.90162	4.61162	3.35439	0.000536768	1.44168	up
867	Os11g0104866	LOC_Os11g01380;	9.59141	14.4334	8.99613	3.65246	6.526	6.41793	0.00181544	-0.972553	down
868	Os05g0326700	--	3.06034	2.87247	2.57841	1.47729	2.04478	1.62136	0.00744015	-0.701666	down
869	Os08g0248100	LOC_Os08g14990;	3.00444	2.19545	3.16819	1.53511	1.66298	1.60767	0.00523399	-0.767455	down
870	Os03g0584050	LOC_Os03g38745;	11.7809	14.8085	16.2564	5.90061	9.98651	9.43021	0.00669491	-0.737616	down
871	Os08g0300300	LOC_Os08g20570;	10.2705	14.7952	15.1803	8.60121	9.51611	7.83471	0.00722694	-0.603824	down
872	Os04g0619000	LOC_Os04g52810;	16.8689	18.5655	20.5397	31.2607	22.7431	37.1763	0.00118062	0.73942	up
873	Os01g0144700	LOC_Os01g05140;	14.5599	16.0862	12.6329	24.0833	20.3651	21.3308	0.00746691	0.640593	up
874	Os04g0583900	LOC_Os04g49450;	1.51997	1.53569	1.18884	2.30817	3.29016	4.32828	0.000418433	1.24257	up
875	Os05g0437800	LOC_Os05g36186;	31.4737	36.8205	35.8	20.3495	23.1785	21.0905	7.1572e-05	-0.658783	down
876	Os07g0419300	LOC_Os07g23730;	29.5826	30.0701	31.3333	52.5595	34.3499	48.4119	0.0070263	0.612113	up
877	Os08g0525900	LOC_Os08g41420;	6.21526	5.96022	5.50274	2.65801	3.86167	3.73923	0.00136525	-0.760002	down
878	Os03g0308700	LOC_Os03g19550;	4.61571	2.86569	2.94311	7.40494	5.87622	7.77025	0.000922937	1.05035	up
879	Os06g0558766	LOC_Os06g36360;	53.5647	59.7833	56.4342	26.5367	35.3326	29.2898	4.86967e-10	-0.871007	down
880	Os05g0163500	LOC_Os05g07080;	2.28206	1.82669	2.50175	1.14386	0.990773	0.807468	0.00150956	-1.12175	down
881	Os06g0722650	LOC_Os06g50715,LOC_Os06g50724;	39.2173	42.4552	40.1015	18.2056	25.8378	20.8586	5.47636e-10	-0.881716	down
882	Os01g0866200	LOC_Os01g64640;	68.9656	62.4137	56.8841	84.1061	107.961	86.9249	0.000222382	0.594937	up
883	Os05g0537200	LOC_Os05g46030;	6.48796	7.25141	4.41382	1.70705	3.36736	2.19147	0.000182469	-1.2981	down
884	Os04g0685200	LOC_Os04g58840;	32.932	24.006	35.5651	49.432	49.4407	41.8719	0.0015487	0.638771	up
885	Oryza_sativa_newGene_6886	--	6.31785	6.49067	6.83671	3.2242	4.76331	4.50529	0.000868067	-0.637455	down
886	Os11g0462500	LOC_Os11g27430;	4.54678	4.04669	4.61711	2.38836	2.9583	2.37334	0.000476307	-0.745743	down
887	Os04g0691400	LOC_Os04g59480;	5.76383	6.66306	7.00206	2.81641	4.04748	2.92752	0.000816261	-0.9604	down
888	Os03g0701500	LOC_Os03g49480;	1.90136	2.81019	3.82223	5.43448	5.38281	5.90944	0.00912217	0.995467	up
889	Os03g0126800	LOC_Os03g03510;	17.6456	25.3116	20.951	7.94855	9.46973	9.24479	7.8053e-11	-1.23385	down
890	Oryza_sativa_newGene_490	--	4.25531	3.70085	3.43009	2.57177	2.19864	2.02295	0.00574916	-0.810005	down
891	Os01g0132000	LOC_Os01g04050;	78.9601	77.9387	72.5286	42.1952	54.8864	47.623	2.09826e-05	-0.638129	down
892	Os10g0442532	--	32.1763	42.3188	34.9448	17.3355	26.2859	25.704	0.00268833	-0.635907	down
893	Os01g0758350	--	0.859209	1.83237	1.14463	0.434306	0.525868	0.446143	0.00254891	-1.4104	down
894	Os05g0443400	LOC_Os05g37130;	3.38842	3.54777	3.41551	2.15285	1.42225	1.90473	0.00246388	-0.864098	down
895	Os03g0565300	LOC_Os03g36760;	2.73965	3.13424	2.91993	1.41119	1.7229	1.32586	1.63867e-05	-0.951022	down
896	Os02g0832400	LOC_Os02g58554;	9.10192	13.6789	9.83378	3.60427	7.28414	5.62197	0.000683983	-0.969244	down
897	Oryza_sativa_newGene_2289	--	16.9211	17.2628	19.6467	8.72741	12.9031	10.1942	0.000228495	-0.677868	down
898	Os03g0255400	LOC_Os03g15040;	10.3982	11.4389	10.2138	6.35715	5.38184	8.33831	0.00530669	-0.64076	down
899	Oryza_sativa_newGene_4850	--	2.78439	3.71187	4.0846	1.93971	1.37982	1.61611	0.00526078	-1.02643	down
900	Os08g0496700	LOC_Os08g38800;	87.8021	123.258	110.79	64.2156	61.8055	69.5091	0.000104265	-0.688053	down
901	Os04g0675101	--	1.39108	1.89715	1.16	0.241619	0.725099	0.477874	6.79083e-05	-1.6097	down
902	Oryza_sativa_newGene_4178	--	4.07259	6.93703	4.61095	2.40339	3.03219	2.68802	0.000200791	-0.919859	down
903	Oryza_sativa_newGene_3158	--	2.89638	3.29041	2.80941	1.77118	2.08366	1.87163	0.00408594	-0.604689	down
904	Oryza_sativa_newGene_8171	--	2.91291	2.97218	1.8276	0.450801	1.25414	0.747755	5.97163e-05	-1.63963	down
905	Os01g0235100	LOC_Os01g13390;	4.84258	5.00896	3.89644	10.2964	7.47366	8.72383	0.000715625	0.98691	up
906	Os12g0416900	--	3.94698	5.96497	4.59123	2.26436	2.76461	2.25228	0.00909202	-0.966281	down
907	Os07g0452100	LOC_Os07g26900;	3.28191	2.42422	2.59555	5.82462	5.95162	4.6418	0.00065674	1.01641	up
908	Os01g0846300	LOC_Os01g62760;	13.8856	14.0539	20.1203	31.8424	22.0057	23.2761	0.00487057	0.720829	up
909	Os06g0638400	--	4.43705	3.6976	3.44718	5.82655	6.85552	7.03909	0.00108026	0.794197	up
910	Os08g0520700	LOC_Os08g40919;	8.23516	6.66599	5.27339	18.9808	18.9409	20.3345	5.77311e-19	1.65123	up
911	Os02g0831100	LOC_Os02g58440;	7.51436	6.21124	6.6219	15.3198	12.6624	14.5902	3.45913e-09	1.10164	up
912	Oryza_sativa_newGene_7004	--	4.60277	5.04901	5.18869	2.11543	2.22108	2.63442	0.000664154	-1.05523	down
913	Os07g0211000	LOC_Os07g10970;	5.52385	8.08634	6.83375	2.81434	4.47225	3.20625	0.000226646	-0.941642	down
914	Oryza_sativa_newGene_155	--	1.87611	0.734848	1.08952	0.02992	0	0.146449	1.61747e-07	-4.37791	down
915	Os09g0551600	LOC_Os09g37910;	544.292	489.347	476.881	792.735	852.256	760.649	3.82914e-11	0.702382	up
916	Os01g0133200	LOC_Os01g04170;	0.824274	1.01051	0.568912	2.52224	2.87706	1.60014	0.00648872	1.55972	up
917	Oryza_sativa_newGene_3970	--	7.98434	8.51768	8.70173	3.79628	5.3534	4.97174	0.0098033	-0.813437	down
918	Os10g0388600	LOC_Os10g24954;	0.912907	0.877663	0.400185	0.15044	0.10586	0.230143	0.00158445	-2.10794	down
919	Oryza_sativa_newGene_440	--	8.96176	13.3362	13.7111	6.90286	6.12256	4.62708	0.00108494	-0.960282	down
920	Os03g0235400	--	3.4445	4.47538	3.76939	0.843247	1.93084	1.98622	0.000255865	-1.28062	down
921	Os12g0467700	LOC_Os12g28137;	2.72142	3.53229	2.57256	1.16474	1.09204	1.87257	0.00932191	-1.15092	down
922	Oryza_sativa_newGene_3190	--	4.81566	3.75992	4.20895	6.74141	6.53466	6.86986	0.000901798	0.67902	up
923	Os09g0131400	LOC_Os09g04504,LOC_Os09g04508;	56.0514	58.5446	58.6352	30.1328	44.5283	31.0186	9.74268e-06	-0.721877	down
924	Os01g0537250	LOC_Os01g35330;	57.9581	56.7313	45.3319	10.4956	14.6826	16.4042	2.56316e-27	-1.91906	down
925	Os03g0600800	LOC_Os03g40370;	0.982279	0.881699	1.33157	0.100973	0.083285	0.304929	0.000971153	-2.66769	down
926	Os09g0407950	LOC_Os09g24260;	9.19511	13.0157	8.96623	2.89909	7.69288	4.75648	0.00285488	-1.00952	down
927	Os01g0773000	LOC_Os01g56620;	3.38664	2.90915	2.51427	1.40162	1.80612	1.61477	0.00999066	-0.834986	down
928	Os06g0575000	LOC_Os06g37690;	2.52101	2.56231	2.57484	1.00669	0.988426	1.30718	0.00410031	-1.17305	down
929	Os04g0490800	LOC_Os04g41340;	5.04968	4.63775	5.36909	8.38172	6.80746	9.85352	0.00337576	0.767563	up
930	Os04g0643700	LOC_Os04g55090;	4.47724	5.34956	5.27613	3.34224	3.14886	2.59545	0.00444147	-0.67553	down
931	Oryza_sativa_newGene_4382	--	0.846074	0.524283	1.10316	2.28904	1.67501	2.382	0.00669351	1.45352	up
932	Os10g0340100	LOC_Os10g19910;	15.5787	15.8779	17.0635	8.48697	10.6302	5.39363	0.00114541	-0.954776	down
933	Os10g0560500	LOC_Os10g41120;	3.36388	4.69368	4.16764	1.82494	1.36034	1.93484	0.00404074	-1.22256	down
934	Os08g0537002	--	1.85956	2.88461	2.48862	1.37775	1.42033	1.08657	0.0019663	-0.86668	down
935	Os03g0654800	LOC_Os03g45220;	18.6795	16.2879	14.0439	26.0869	22.1707	28.0718	0.00550399	0.674375	up
936	Oryza_sativa_newGene_2920	--	3.35906	3.75986	3.43275	1.94667	1.83242	1.49194	0.0083614	-0.852834	down
937	Os02g0184900	LOC_Os02g09220;	29.8099	34.9382	38.3028	21.9777	18.3413	24.9012	0.00172812	-0.625913	down
938	Os04g0492500	LOC_Os04g41510;	6.44631	8.58443	6.52701	1.82061	3.72585	2.42585	2.15272e-05	-1.41613	down
939	Os10g0130800	LOC_Os10g04090;	8.39422	10.0847	7.62711	3.3996	6.9742	4.76874	0.00602509	-0.767717	down
940	Os05g0158700	LOC_Os05g06680;	4.61713	8.81319	7.93496	1.38131	2.74029	2.58292	2.62293e-06	-1.65363	down
941	Os11g0685500	--	18.6844	22.6453	18.6658	4.8068	11.1209	8.73345	4.6006e-06	-1.26714	down
942	Os09g0412400	LOC_Os09g24590;	22.7376	17.8575	21.5134	40.9096	30.194	28.8661	0.00282874	0.725983	up
943	Oryza_sativa_newGene_1989	--	5.03659	5.60155	5.27668	3.14296	3.9167	2.62096	0.00380419	-0.689133	down
944	Os01g0159000	LOC_Os01g06560;	0.768893	0.711999	0.890914	1.90577	2.52842	1.60257	0.00380419	1.37029	up
945	Os06g0664100	LOC_Os06g45360;	10.3056	10.9653	9.72798	2.75394	5.44855	5.04712	0.00033608	-1.20683	down
946	Oryza_sativa_newGene_2163	--	5.2648	6.23908	7.00325	5.11351	3.91225	4.6736	1.72174e-07	-1.09403	down
947	Os03g0252100	LOC_Os03g14730;	1.03368	1.27262	1.56031	3.64864	2.51552	2.67492	0.00129442	1.226	up
948	Oryza_sativa_newGene_5482	--	3.93438	4.74172	3.96556	2.58831	2.50687	2.76167	0.00559608	-0.726338	down
949	Os09g0451000	LOC_Os09g27750;	27.7678	39.5736	27.9477	19.8002	14.1536	19.4721	0.00110134	-0.798088	down
950	Oryza_sativa_newGene_7204	--	3.14539	1.63267	1.97175	4.05746	6.72674	3.69913	0.00544047	1.12551	up
951	Os01g0260100	LOC_Os01g15540;	7.09887	7.45474	7.19081	2.24522	3.83559	5.23009	0.00216522	-0.921237	down
952	Oryza_sativa_newGene_4492	--	2.262	2.8069	4.07946	1.53812	1.71215	1.172	0.000695193	-1.01783	down
953	Os08g0551300	LOC_Os08g43750;	7.46241	7.96776	10.0698	4.45888	4.86968	4.54143	0.00401764	-0.847227	down
954	Os07g0284950	--	4.6144	5.4404	5.5424	2.6545	3.97348	2.44055	0.00374144	-0.758146	down
955	Os02g0653400	LOC_Os02g43670;	36.6128	36.3056	33.6688	55.75	44.7868	59.3393	0.000323466	0.620363	up
956	Oryza_sativa_newGene_3196	--	1.65374	1.67966	1.38391	0.345268	0.496961	0.382273	0.0083614	-1.84181	down
957	Os01g0846800	LOC_Os01g62810;	3.39936	4.27377	6.80301	22.768	14.8296	31.6178	3.76155e-11	2.29123	up
958	Oryza_sativa_newGene_2946	--	8.09791	8.48273	6.17735	3.32255	4.63355	3.88634	2.44392e-05	-0.87418	down
959	Os03g0285100	LOC_Os03g17660;	3.29373	5.13138	5.35094	10.3512	7.81626	8.97085	0.000509265	1.01188	up
960	Os05g0435500	LOC_Os05g35980;	26.4732	27.2307	30.6849	13.0745	18.1203	13.1663	1.60859e-06	-0.747322	down
961	Os11g0435400	LOC_Os11g24790;	0.691195	1.07494	0.896207	0.313745	0.18602	0.154709	0.00516468	-1.93233	down
962	Os10g0416200	LOC_Os10g28060;	18.2962	18.5728	15.017	28.2384	29.1224	26.5598	2.09826e-05	0.726034	up
963	Os07g0296000	--	4.03797	5.293	4.17265	2.52246	2.8476	2.39816	0.000401539	-0.76788	down
964	Oryza_sativa_newGene_7827	--	2.39498	2.00264	1.95931	0.747095	1.43374	0.907801	0.00880874	-1.03358	down
965	Os02g0522300	LOC_Os02g32250;	9.96458	10.4952	10.9135	5.64178	8.2898	6.13718	0.000197403	-0.687569	down
966	Os01g0644000	LOC_Os01g45640;	58.555	55.263	58.8667	96.1376	67.3182	93.0317	0.00412464	0.604466	up
967	Os03g0753600	LOC_Os03g54220;	14.1714	13.8146	12.9684	8.09815	9.61235	8.01927	5.8937e-05	-0.653683	down
968	Os06g0720500	LOC_Os06g50560;	13.5693	15.3887	14.2267	6.3174	10.6298	6.48564	4.52341e-05	-0.829396	down
969	Os04g0532400	LOC_Os04g45000;	11.4314	10.1987	10.014	18.6885	23.8232	13.6841	0.000531649	0.856419	up
970	Os09g0520000	LOC_Os09g34847;	28.1972	28.6862	28.1782	11.9987	19.4123	14.2002	2.78349e-05	-0.877201	down
971	Os10g0567900	LOC_Os10g41838;	13.9954	10.9078	13.3807	1.24267	1.11535	1.94832	2.28377e-41	-3.11617	down
972	Oryza_sativa_newGene_316	--	9.2442	10.7129	9.40029	4.59206	7.66067	5.8764	0.00184644	-0.668943	down
973	Os06g0652100	LOC_Os06g44240;	12.3152	14.1685	12.411	6.91096	8.99087	8.36816	0.000256218	-0.65441	down
974	Oryza_sativa_newGene_7543	--	7.22204	7.50209	9.26067	11.9712	10.6777	12.7757	0.00194633	0.595472	up
975	Os06g0223300	LOC_Os06g11970;	27.711	32.3045	42.736	24.0005	23.215	18.7341	0.00936421	-0.607339	down
976	Os08g0566600	LOC_Os08g45190;	6.37706	8.63809	8.45354	17.5012	11.4328	20.9095	0.000437159	1.12119	up
977	Os07g0591700	LOC_Os07g40220;	43.1614	42.998	40.0446	75.0819	77.718	55.1108	3.70955e-05	0.752161	up
978	Oryza_sativa_newGene_1433	--	3.20285	3.85207	4.42569	2.11777	2.39756	2.14739	0.00232971	-0.765631	down
979	Os07g0694300	LOC_Os07g49360;	3.26968	3.07652	4.03161	6.41914	5.95536	6.7613	0.00140254	0.911095	up
980	Os04g0614650	LOC_Os04g52460;	14.8675	18.327	15.6026	5.62389	10.6775	9.27109	7.53451e-05	-0.912907	down
981	Os01g0246400	LOC_Os01g14410;	0.420702	0.224015	0.287222	4.66663	1.08503	2.321	1.25993e-05	3.10653	up
982	Os03g0622500	LOC_Os03g42464;	31.8706	41.3812	42.1337	19.5302	22.1267	16.1394	1.34888e-08	-0.978891	down
983	Os01g0606900	LOC_Os01g42190;	7.02531	5.08371	5.3123	2.83539	2.85178	2.78245	0.000536906	-1.00579	down
984	Os09g0455200	LOC_Os09g28200;	2.82215	2.06153	2.26542	3.9153	5.26212	4.11297	0.00142738	0.917942	up
985	Os05g0148700	LOC_Os05g05600;	17.6994	23.0996	22.3012	31.3478	29.6759	33.1417	7.24435e-05	0.701541	up
986	Os06g0549700	LOC_Os06g35670;	16.5695	16.5671	18.01	9.94139	10.8547	11.4127	7.53699e-07	-0.637372	down
987	Os03g0816900	LOC_Os03g60240;	1.27526	1.79772	1.20539	0.297713	0.484389	0.74697	0.00129442	-1.45754	down
988	Os12g0117100	LOC_Os12g02500;	5.0717	4.16289	5.92817	12.9792	9.4844	10.7074	1.27218e-05	1.16624	up
989	Os05g0507000	LOC_Os05g43140;	1.92789	1.99511	2.7363	4.77059	4.92627	3.74728	0.00893672	1.04782	up
990	Os01g0788400	LOC_Os01g57854;	5.42078	5.7786	5.53064	10.8268	9.1822	8.48923	0.000113378	0.804102	up
991	Oryza_sativa_newGene_9895	--	2.82263	2.95615	2.83426	0.783655	0.964024	1.11259	0.000144175	-1.70203	down
992	Os11g0456050	--	8.1624	8.91146	9.32067	5.34745	4.95324	3.83179	0.00799522	-0.863267	down
993	Os11g0150400	LOC_Os11g05290;	36.1344	35.5844	36.1868	55.6298	65.1103	34.2792	0.00126669	0.617583	up
994	Os11g0685600	LOC_Os11g45840;	21.6052	21.2601	27.0375	13.6406	17.1573	12.0011	0.00153687	-0.679572	down
995	Os08g0254200	LOC_Os08g15444;	22.5692	20.5975	21.6419	13.5545	15.895	12.2311	6.3954e-05	-0.607155	down
996	Os04g0519925	LOC_Os04g43916;	3.21193	4.65755	2.408	0.972878	1.35716	1.08494	0.00108033	-1.54779	down
997	Os04g0608600	LOC_Os04g51920;	3.91249	4.17109	4.04508	1.54911	2.7875	2.09698	0.00273006	-0.890367	down
998	Os12g0145900	LOC_Os12g05120;	3.74005	3.05619	3.29692	4.52092	6.63866	5.28716	0.00176384	0.726933	up
999	Os08g0503000	LOC_Os08g39330;	20.2965	20.401	24.8331	34.6738	29.7806	33.8268	0.00144711	0.61873	up
1000	Os06g0505302	LOC_Os06g30901;	3.77019	5.47313	4.3832	0.795886	2.44991	1.77078	0.000217091	-1.42968	down
1001	Os06g0671800	LOC_Os06g45990;	13.4945	8.60824	9.43448	15.5646	17.6488	13.4112	0.00991734	0.595846	up
1002	Os03g0724100	LOC_Os03g51430;	32.2145	48.0596	40.8187	29.9862	19.0534	22.9323	0.00679979	-0.710913	down
1003	Os10g0563600	LOC_Os10g41400;	65.5838	60.3502	61.1429	100.486	77.1049	102.166	0.000488133	0.611284	up
1004	Os03g0215400	LOC_Os03g11614;	23.2599	22.9882	24.5864	32.5489	38.6367	33.8053	2.08041e-05	0.595474	up
1005	Os08g0132100	LOC_Os08g03780,LOC_Os08g03790;	2.78305	3.63853	3.57715	1.29783	1.64704	0.894108	0.00065674	-1.34565	down
1006	Os06g0113150	--	7.67388	13.8583	8.30297	3.15872	5.6062	4.44487	0.000526357	-1.15602	down
1007	Os02g0205200	LOC_Os02g11040;	27.2947	21.1447	25.7641	52.7345	42.8403	41.9954	1.42598e-07	0.927675	up
1008	Os08g0506400	LOC_Os08g39590;	8.23987	7.14597	6.17662	9.92076	12.0386	10.1462	0.00160818	0.603393	up
1009	Os01g0595001	LOC_Os01g41180;	19.7195	24.4926	17.2765	36.6747	29.6601	36.416	0.000669699	0.77535	up
1010	Oryza_sativa_newGene_1083	--	2.55848	1.09515	1.84675	4.24447	4.2778	3.4491	0.00858317	1.1557	up
1011	Os06g0685300	LOC_Os06g47130;	2.43242	3.24818	2.33798	1.47494	1.45244	0.953284	0.00690054	-1.01112	down
1012	Os03g0294650	--	2.19804	3.15003	2.59365	1.05598	1.17606	1.69792	0.00447841	-0.987314	down
1013	Os08g0566100	LOC_Os08g45170;	20.1448	16.8443	20.5375	30.8965	31.1707	23.5317	0.00165329	0.606573	up
1014	Os11g0114900	LOC_Os11g02330;	58.6014	56.9661	70.5675	148.473	88.6138	93.2927	0.000516276	0.870403	up
1015	Os02g0756800	LOC_Os02g52010;	1.76744	4.92449	0.941688	0.136077	0.21533	0.376148	9.8537e-06	-3.34678	down
1016	Os06g0731600	--	7.40636	11.3428	7.73761	3.33025	5.6277	4.89433	0.000437159	-0.915214	down
1017	Os02g0567000	LOC_Os02g35890;	22.4153	18.9394	19.425	34.4367	30.6773	33.035	4.41325e-05	0.726293	up
1018	Os06g0678700	LOC_Os06g46480;	5.34102	7.34326	5.28463	1.67819	2.96242	2.33893	1.30026e-06	-1.38925	down
1019	Os06g0102800	LOC_Os06g01320;	4.37753	5.72997	4.07031	1.55817	3.08194	2.92812	0.00410031	-0.887127	down
1020	Oryza_sativa_newGene_5502	--	1.73813	1.92805	1.9765	0.896262	0.58543	0.332553	0.00212373	-1.64262	down
1021	Os02g0518800	LOC_Os02g31920,LOC_Os02g31922,LOC_Os02g31924,LOC_Os02g31926;	10.4676	11.5847	11.0093	5.73351	6.89275	5.99249	4.72233e-08	-0.800012	down
1022	Os08g0157600	LOC_Os08g06110;	20.4318	34.6022	37.8382	153.879	157.679	264.873	5.69244e-09	2.55843	up
1023	Os11g0499600	LOC_Os11g30560;	3.20089	3.02811	2.55744	4.65545	6.67984	5.91287	0.000245727	0.999094	up
1024	Os05g0481100	LOC_Os05g40270,LOC_Os05g402700,LOC_Os05g402702;	32.3706	31.7165	29.523	15.6194	23.4091	21.0529	0.00106261	-0.591137	down
1025	Os04g0454200	LOC_Os04g38220;	13.7882	15.1381	17.0768	26.3633	22.478	28.2321	1.21975e-05	0.778216	up
1026	Oryza_sativa_newGene_6371	--	1.77649	2.80386	3.00884	1.00172	1.02605	1.28085	0.000335587	-1.18165	down
1027	Os01g0946500	LOC_Os01g71810;	13.7084	14.1569	17.8135	26.6507	24.1338	34.8813	1.27087e-05	0.938836	up
1028	Os05g0103800	LOC_Os05g01330;	12.2705	10.691	9.30351	4.64988	4.07946	4.07498	2.37823e-05	-1.28998	down
