# Supplementary material for: Transcriptome Analyses Show Changes in Gene Expression Triggered by a 31-bp InDel within OsSUT3 5′UTR in Rice Panicle
Source: Int J Mol Sci. 2023 Jun 26;24(13):10640. doi: 10.3390/ijms241310640 (PMC10341534; doi:10.3390/ijms241310640)
Supplement: Supplementary file 1 [file ijms-24-10640-s001.zip › Table S2. 44 subclasses enriched by GO.xlsx]

## Sheet: Sheet1
Table S2. 44 subclasses enriched by GO.
Serial number	GO_classify1	GO_classify2	Number of DEGs	Gene ID
1	cellular component	extracellular region	21	Os04g0311400;Os09g0497500;Os12g0111800;Os06g0695400;Os06g0237400;Os02g0744200;Os04g0604300;Os01g0132000;Os06g0545800;Os01g0788400;Os07g0419300;Os12g0568900;Os01g0823100;Os04g0530100;Os01g0842500;Os03g0336400;Os05g0135500;Os05g0247800;Os05g0279900;Os07g0694300;Os02g0639500
2	cellular component	cell	212	Os03g0326500;Os06g0223300;Os05g0319800;Os07g0589200;Os02g0265900;Os09g0480700;Os08g0505900;Os04g0439400;Os03g0215400;Os04g0604300;Os02g0202300;Os01g0713900;Os08g0308700;Os06g0298200;Os07g0685000;Os05g0393800;Os08g0376300;Os06g0499301;Os06g0614000;Os03g0102300;Os12g0204500;Os04g0270200;Os03g0816900;Os11g0150100;Os01g0652100;Os11g0150400;Os05g0543600;Os03g0679700;Os05g0140500;Os02g0744200;Os12g0145…
3	cellular component	membrane	190	Os03g0847900;Os03g0285100;Os11g0569500;Os08g0178200;Os01g0209800;Os06g0184700;Os03g0411800;Oryza_sativa_newGene_8450;Os01g0759900;Os09g0533200;Os02g0744900;Os02g0118875;Os05g0495300;Os11g0526200;Os01g0823100;Os07g0171100;Os09g0407950;Os01g0627400;Os09g0268300;Os11g0276000;Os12g0181500;Os12g0265400;Os10g0482450;Os02g0695600;Os01g0846300;Os01g0934500;Os02g0714100;Os04g0419900;Os05g0165900;Os06g0228…
4	cellular component	cell junction	6	Os03g0281500;Os11g0104866;Os09g0548200;Os03g0736500;Os09g0425900;Os04g0555600
5	cellular component	membrane-enclosed lumen	5	Os01g0775100;Os07g0203275;Os06g0731600;Os07g0645200;Os08g0332800
6	cellular component	macromolecular complex	37	Os08g0332800;Oryza_sativa_newGene_1207;Os02g0832400;Os07g0203275;Os06g0731600;Os01g0968600;Os05g0489800;Os02g0798800;Os05g0243200;Os11g0276000;Os01g0552000;Os09g0296800;Os11g0104050;Os07g0211000;Os05g0163250;Os09g0346500;Os10g0395150;Os07g0489500;Os02g0478900;Os10g0100300;Os05g0537200;Os07g0645200;Os02g0202300;Os06g0618000;Os10g0556700;Os03g0736500;Os01g0939600;Os04g0402200;Os04g0270200;Os08g0295…
7	cellular component	organelle	155	Os01g0235100;Os09g0497500;Os06g0728700;Os02g0162766;Os07g0204900;Os07g0273700;Oryza_sativa_newGene_9891;Os02g0682200;Os04g0445700;Os06g0105800;Os12g0265600;Os09g0286600;Os01g0919400;Os01g0502900;Os05g0489800;Os02g0527300;Os07g0671800;Os03g0701500;Os10g0563600;Os01g0260000;Os06g0671800;Os11g0685600;Oryza_sativa_newGene_3042;Os04g0675101;Os08g0426866;Os10g0254720;Os09g0346500;Os03g0666600;Os08g0416…
8	cellular component	other organism	3	Os02g0527300;Os09g0455200;Os06g0704800
9	cellular component	other organism part	3	Os09g0455200;Os02g0527300;Os06g0704800
10	cellular component	extracellular region part	2	Os09g0497500;Os04g0311400
11	cellular component	organelle part	44	Os02g0580400;Os06g0614000;Os11g0595200;Os08g0393600;Os12g0265600;Os01g0775100;Os01g0502900;Os04g0270200;Os03g0799900;Os01g0713900;Os11g0104866;Os07g0204900;Os11g0216300;Os06g0618000;Os02g0673100;Os02g0202300;Os07g0645200;Os02g0705100;Os01g0246400;Os02g0265900;Os03g0326500;Os02g0714100;Os05g0163250;Os11g0104050;Os12g0265400;Os02g0125700;Os09g0296800;Os07g0520800;Os07g0171100;Os09g0407950;Os05g0537…
12	cellular component	membrane part	175	Os03g0847900;Os03g0285100;Os11g0569500;Os08g0178200;Os01g0209800;Os06g0184700;Os03g0411800;Oryza_sativa_newGene_8450;Os01g0759900;Os09g0533200;Os02g0118875;Os05g0495300;Os11g0526200;Os07g0171100;Os01g0627400;Os09g0268300;Os10g0482450;Os12g0265400;Os12g0181500;Os02g0695600;Os01g0846300;Os01g0934500;Os02g0714100;Os04g0419900;Os05g0165900;Os06g0228800;Os11g0151700;Os06g0626050;Os02g0705100;Os01g0192…
13	cellular component	cell part	212	Os04g0643700;Os02g0724000;Os10g0100300;Os10g0557600;Os02g0228900;Os09g0425900;Os07g0489500;Os02g0202000;Os05g0256500;Os07g0520800;Os02g0665000;Os05g0148700;Os05g0100500;Os01g0789100;Os02g0832400;Os07g0203275;Os06g0731600;Os07g0452100;Os01g0968600;Os02g0579000;Os09g0538500;Os02g0798800;Os06g0194400;Os08g0520550;Os09g0560000;Os11g0155500;Os06g0493801;Os05g0443400;Os03g0799900;Os12g0157000;Os11g0523…
14	cellular component	symplast	6	Os04g0555600;Os09g0425900;Os03g0736500;Os09g0548200;Os11g0104866;Os03g0281500
15	cellular component	supramolecular complex	1	Os09g0560000
16	molecular function	transcription factor activity, protein binding	5	Os08g0332800;Os05g0100500;Os03g0733600;Os06g0704800;Os07g0645200
17	molecular function	nucleic acid binding transcription factor activity	16	Os09g0455200;Os02g0202000;Os02g0203000;Os09g0286600;Os05g0589200;Os02g0682200;Os12g0157000;Os02g0708500;Os11g0685600;Os01g0264000;Os03g0215400;Os02g0527300;Os06g0223300;Os07g0589200;Os05g0586600;Os05g0543600
18	molecular function	catalytic activity	230	Os09g0491100;Os09g0368500;Os02g0703600;Os10g0342300;Os04g0644600;Os01g0701700;Os12g0119000;Os04g0393500;Os03g0436400;Os08g0393600;Os02g0618100;Os09g0252700;Os01g0260100;Os06g0560700;Os10g0142600;Os01g0939600;Os08g0174100;Os11g0151700;Os03g0201800;Os08g0464400;Os06g0664100;Os01g0229700;Os05g0165900;Os04g0419900;Os02g0714100;Os03g0371000;Os05g0132000;Os11g0216300;Os12g0226900;Os06g0133000;Os02g0733…
19	molecular function	signal transducer activity	1	Os04g0140666
20	molecular function	structural molecule activity	6	Os07g0489500;Os06g0701400;Os05g0243200;Oryza_sativa_newGene_1207;Os11g0104866;Os11g0657400
21	molecular function	transporter activity	35	Os12g0566000;Os09g0426500;Os05g0393800;Oryza_sativa_newGene_7227;Os04g0587500;Os03g0203700;Os06g0566300;Os04g0454200;Os06g0626050;Os01g0695700;Os01g0297700;Oryza_sativa_newGene_6410;Os02g0288400;Os05g0319800;Os08g0503700;Os09g0556400;Os04g0422300;Os03g0571900;Os06g0707100;Os06g0270200;Os02g0574500;Os07g0669700;Os06g0706400;Os04g0691400;Os03g0724100;Os09g0268300;Os01g0878700;Os08g0178200;Os11g0155…
22	molecular function	binding	295	Os06g0558766;Os02g0744900;Oryza_sativa_newGene_705;Os08g0470200;Os07g0438500;Os05g0537200;Os01g0627400;Oryza_sativa_newGene_3854;Oryza_sativa_newGene_9089;Os01g0725800;Os01g0846300;Os09g0451000;Os02g0810900;Oryza_sativa_newGene_1207;Os06g0695400;Os02g0168100;Os01g0972900;Os09g0551600;Os12g0467700;Os01g0547000;Os01g0974701;Os01g0187900;Os03g0859700;Os03g0126800;Oryza_sativa_newGene_8450;Os02g06062…
23	molecular function	electron carrier activity	3	Os05g0529700;Os02g0618100;Os04g0393500
24	molecular function	antioxidant activity	5	Os05g0135500;Os06g0695400;Os07g0694300;Os12g0111800;Os04g0608600
25	molecular function	protein tag	1	Os07g0489500
26	molecular function	nutrient reservoir activity	1	Os01g0976200
27	molecular function	molecular transducer activity	1	Os04g0140666
28	molecular function	molecular function regulator	6	Os05g0247800;Os03g0799900;Os06g0301300;Os01g0132000;Os01g0788400;Os01g0972900
29	biological process	reproduction	18	Os05g0165900;Os04g0419900;Os03g0847900;Os05g0163500;Os03g0733600;Os08g0464400;Os11g0657400;Os06g0199100;Os06g0575000;Os02g0553802;Os06g0194900;Os08g0179150;Os02g0682200;Os06g0602500;Os10g0342300;Os02g0639500;Os06g0499301;Os05g0148700
30	biological process	metabolic process	240	Os08g0248100;Os01g0627500;Os05g0476700;Os12g0265600;Os01g0919400;Os05g0279900;Os12g0128700;Oryza_sativa_newGene_1450;Oryza_sativa_newGene_3229;Os07g0694300;Os01g0660200;Os05g0161200;Os04g0492500;Os04g0685200;Os02g0153900;Os05g0549100;Os06g0505302;Os06g0194900;Os04g0445700;Os06g0237400;Os05g0550000;Os06g0318600;Os07g0204900;Os06g0256900;Os01g0788400;Os05g0446000;Os02g0771700;Os10g0468500;Os04g0402…
31	biological process	cellular process	230	Os01g0369700;Os07g0671800;Os03g0701500;Os01g0260000;Os04g0409200;Os06g0671800;Os12g0111800;Os03g0281500;Oryza_sativa_newGene_6209;Os04g0675101;Os04g0140666;Os04g0608600;Oryza_sativa_newGene_3042;Oryza_sativa_newGene_8749;Os08g0114200;Os09g0442100;Oryza_sativa_newGene_6886;Os09g0346500;Os10g0254720;Os06g0270200;Os01g0842500;Os02g0153100;Oryza_sativa_newGene_9283;Os01g0552000;Os05g0104650;Os05g0446…
32	biological process	reproductive process	18	Os06g0199100;Os06g0575000;Os11g0657400;Os05g0165900;Os04g0419900;Os03g0847900;Os03g0733600;Os08g0464400;Os05g0163500;Os02g0639500;Os05g0148700;Os06g0499301;Os02g0553802;Os06g0194900;Os08g0179150;Os10g0342300;Os06g0602500;Os02g0682200
33	biological process	signaling	10	Os10g0468500;Os02g0805100;Os02g0228900;Os04g0140666;Os09g0339300;Os08g0520550;Oryza_sativa_newGene_9283;Os02g0203000;Os08g0529000;Os03g0126800
34	biological process	multicellular organismal process	23	Os02g0553802;Os06g0194900;Os08g0179150;Os04g0469800;Os12g0157000;Os10g0342300;Os06g0602500;Os02g0682200;Os12g0621100;Os03g0436400;Os06g0499301;Os05g0148700;Os09g0527900;Os03g0847900;Os04g0419900;Os05g0165900;Os05g0163500;Os08g0464400;Os03g0733600;Os11g0657400;Os06g0575000;Os06g0199100;Os07g0136800
35	biological process	developmental process	22	Os09g0527900;Os03g0847900;Os07g0671800;Os05g0543600;Os03g0733600;Os08g0464400;Os11g0657400;Os07g0136800;Os06g0199100;Os06g0194900;Os02g0553802;Os05g0151300;Os12g0157000;Os04g0469800;Os10g0557600;Os02g0682200;Os12g0621100;Os12g0490000;Os06g0499301;Os08g0116700;Os03g0436400;Os05g0148700
36	biological process	growth	6	Os08g0464400;Os02g0682200;Os03g0847900;Os07g0671800;Os11g0657400;Os05g0151300
37	biological process	single-organism process	153	Os06g0270200;Os01g0842500;Oryza_sativa_newGene_9283;Os01g0552000;Os11g0114900;Os07g0671800;Os10g0563600;Os03g0701500;Os04g0409200;Os06g0671800;Os01g0878700;Os12g0111800;Os02g0187000;Os04g0140666;Os04g0497000;Os04g0608600;Oryza_sativa_newGene_8749;Os06g0505302;Os06g0194900;Os04g0445700;Os02g0682200;Os07g0694300;Os05g0161200;Os01g0627500;Os04g0587500;Os12g0265600;Os01g0919400;Os12g0128700;Os05g0104…
38	biological process	rhythmic process	3	Os01g0281100;Os11g0547000;Os03g0387900
39	biological process	response to stimulus	56	Os11g0216300;Os11g0547000;Os06g0472000;Os01g0974400;Os08g0529000;Os07g0645200;Os01g0149500;Os06g0618000;Os12g0568900;Os07g0419300;Os02g0629800;Os02g0805100;Os05g0446000;Os10g0468500;Os07g0671500;Os09g0527900;Os08g0489300;Os05g0542500;Os03g0436400;Os11g0595200;Os07g0694300;Os08g0295100;Os11g0655300;Os11g0462500;Os10g0394400;Os11g0689100;Os05g0135500;Os04g0608600;Os01g0187900;Os06g0517700;Oryza_sat…
40	biological process	localization	68	Os11g0115350;Os06g0270200;Os01g0822900;Os03g0819400;Os02g0574500;Os08g0116700;Os03g0251600;Os11g0104050;Os07g0669700;Os11g0114900;Os04g0691400;Os12g0115100;Os03g0724100;Os01g0878700;Os06g0671800;Os07g0671800;Os02g0649900;Os04g0543600;Os08g0300300;Os12g0566000;Os09g0426500;Os05g0393800;Os02g0584800;Os04g0587500;Os12g0594200;Os12g0115000;Os06g0566300;Os01g0297700;Os01g0695700;Os04g0454200;Os02g0288…
41	biological process	multi-organism process	16	Os05g0165900;Os03g0847900;Os04g0419900;Os05g0163500;Os06g0575000;Os11g0657400;Os04g0140666;Os01g0974400;Os08g0179150;Os06g0602500;Os10g0342300;Os07g0694300;Os02g0639500;Os05g0247800;Os11g0595200;Os08g0116700
42	biological process	biological regulation	86	Os05g0543600;Os06g0704800;Os06g0671800;Os07g0671800;Os02g0527300;Os11g0685600;Os08g0300300;Os01g0913000;Os04g0140666;Os04g0675101;Os08g0426866;Os01g0182600;Os03g0387900;Os04g0619000;Os10g0506200;Os08g0416000;Oryza_sativa_newGene_1714;Os09g0339300;Os01g0552000;Oryza_sativa_newGene_9283;Os04g0402200;Os10g0468500;Os09g0480700;Os05g0319800;Os07g0589200;Os06g0223300;Os06g0301300;Os08g0529000;Os01g0281…
43	biological process	cellular component organization or biogenesis	37	Os05g0151300;Os06g0194900;Os03g0336400;Os08g0308700;Os12g0490000;Os12g0204500;Os03g0816900;Os01g0502900;Os11g0595200;Os05g0279900;Os08g0464400;Os03g0736500;Os04g0604300;Os09g0478300;Os02g0708500;Os01g0788400;Os11g0216300;Os06g0237400;Os02g0553802;Os11g0526200;Os02g0478900;Os01g0823100;Os09g0407950;Os07g0171100;Os07g0520800;Os08g0116700;Os07g0671800;Os03g0847900;Os06g0704800;Os06g0731600;Os08g0467…
44	biological process	detoxification	5	Os07g0694300;Os06g0695400;Os05g0135500;Os04g0608600;Os12g0111800
		Total_gene	571
