# Supplementary material for: Transcriptome Analyses Show Changes in Gene Expression Triggered by a 31-bp InDel within OsSUT3 5′UTR in Rice Panicle
Source: Int J Mol Sci. 2023 Jun 26;24(13):10640. doi: 10.3390/ijms241310640 (PMC10341534; doi:10.3390/ijms241310640)
Supplement: Supplementary file 1 [file ijms-24-10640-s001.zip › Table S3. Top 22 secondary items enriched by GO.xlsx]

## Sheet: Sheet1
Table S3. Top 22 secondary items enriched by GO.
Serial number	GO classification	ID	secondary item	pvalue	gene_number	Contained	geneID
1	Biological_Process_enrich	GO:0015074	DNA integration	7.90868e-07	15	up&down	Oryza_sativa_newGene_1295;Oryza_sativa_newGene_1588;Oryza_sativa_newGene_2815;Oryza_sativa_newGene_3158;Oryza_sativa_newGene_3229;Oryza_sativa_newGene_3854;Oryza_sativa_newGene_4291;Oryza_sativa_newGene_6200;Oryza_sativa_newGene_6209;Oryza_sativa_newGene_6333;Oryza_sativa_newGene_6705;Oryza_sativa_newGene_6886;Oryza_sativa_newGene_705;Oryza_sativa_newGene_8836;Oryza_sativa_newGene_908
2	Molecular_Function_enrich	GO:0008289	lipid binding	1.5116e-05	12	up&down	Os01g0822900;Os03g0251600;Os06g0685300;Os06g0720500;Os06g0722300;Os06g0722650;Os11g0114900;Os11g0115350;Os11g0115400;Os12g0114500;Os12g0115000;Os12g0115100
3	Biological_Process_enrich	GO:0006869	lipid transport	4.43008e-05	9	up&down	Os01g0822900;Os03g0251600;Os06g0685300;Os11g0114900;Os11g0115350;Os11g0115400;Os12g0114500;Os12g0115000;Os12g0115100
4	Biological_Process_enrich	GO:0005975	carbohydrate metabolic process	0.000243805	22	up&down	Os01g0660200;Os01g0939600;Os01g0946500;Os02g0131400;Os02g0771700;Os03g0201800;Os03g0722500;Os04g0409200;Os04g0474500;Os05g0247800;Os05g0279900;Os05g0399400;Os05g0399700;Os06g0545800;Os06g0628500;Os06g0675700;Os07g0452100;Os09g0491100;Os09g0533200;Os10g0323500;Os10g0416800;Os12g0554100
5	Molecular_Function_enrich	GO:0004553	hydrolase activity, hydrolyzing O-glycosyl compounds	0.000472404	15	up&down	Os01g0660200;Os01g0946500;Os02g0131400;Os02g0771700;Os03g0201800;Os03g0722500;Os04g0409200;Os04g0474500;Os04g0604300;Os06g0237400;Os06g0675700;Os09g0491100;Os09g0533200;Os10g0323500;Os10g0416800
6	Biological_Process_enrich	GO:0045053	protein retention in Golgi apparatus	0.00182525	2	down	Os02g0470600;Os12g0594200
7	Biological_Process_enrich	GO:0080186	developmental vegetative growth	0.00182525	2	up	Os05g0151300;Os07g0671800
8	Molecular_Function_enrich	GO:0008115	sarcosine oxidase activity	0.00184583	2	up&down	Os09g0498500;Os12g0543600
9	Molecular_Function_enrich	GO:0016278	lysine N-methyltransferase activity	0.00184583	2	down	Os02g0553802;Os02g0708500
10	Molecular_Function_enrich	GO:0042054	histone methyltransferase activity	0.00184583	2	down	Os02g0553802;Os02g0708500
11	Biological_Process_enrich	GO:0048589	developmental growth	0.00333309	5	up&down	Os03g0847900;Os05g0151300;Os07g0671800;Os08g0464400;Os11g0657400
12	Biological_Process_enrich	GO:2000070	regulation of response to water deprivation	0.0035904	2	up	Os05g0151300;Os07g0671800
13	Molecular_Function_enrich	GO:0008170	N-methyltransferase activity	0.00363044	2	down	Os02g0553802;Os02g0708500
14	Molecular_Function_enrich	GO:0003676	nucleic acid binding	0.00412123	34	up&down	Oryza_sativa_newGene_1295;Oryza_sativa_newGene_1588;Oryza_sativa_newGene_2815;Oryza_sativa_newGene_3158;Oryza_sativa_newGene_3229;Oryza_sativa_newGene_3854;Oryza_sativa_newGene_4036;Oryza_sativa_newGene_4291;Oryza_sativa_newGene_6200;Oryza_sativa_newGene_6209;Oryza_sativa_newGene_6333;Oryza_sativa_newGene_6671;Oryza_sativa_newGene_6705;Oryza_sativa_newGene_6886;Oryza_sativa_newGene_705;Oryza_sati…
15	Biological_Process_enrich	GO:0009637	response to blue light	0.00454322	3	up&down	Os04g0690800;Os11g0216300;Os11g0547000
16	Biological_Process_enrich	GO:0010114	response to red light	0.00454322	3	up&down	Os02g0203000;Os04g0690800;Os11g0216300
17	Cellular_Component_enrich	GO:0009535	chloroplast thylakoid membrane	0.005358	9	up&down	Os01g0246400;Os02g0125700;Os02g0744900;Os07g0171100;Os07g0520800;Os09g0296800;Os09g0346500;Os10g0100300;Os11g0595200
18	Biological_Process_enrich	GO:0040007	growth	0.00551197	5	up&down	Os03g0847900;Os05g0151300;Os07g0671800;Os08g0464400;Os11g0657400
19	Cellular_Component_enrich	GO:0016459	myosin complex	0.00612579	3	down	Os01g0713900;Os05g0537200;Os10g0395150
20	Molecular_Function_enrich	GO:0008061	chitin binding	0.00685078	3	up	Os05g0399400;Os05g0399700;Os09g0548200
21	Biological_Process_enrich	GO:0019915	lipid storage	0.00868379	2	up	Os05g0151300;Os07g0671800
22	Biological_Process_enrich	GO:0034389	lipid particle organization	0.00868379	2	up	Os05g0151300;Os07g0671800
