# Supplementary material for: Transcriptome Analyses Show Changes in Gene Expression Triggered by a 31-bp InDel within OsSUT3 5′UTR in Rice Panicle
Source: Int J Mol Sci. 2023 Jun 26;24(13):10640. doi: 10.3390/ijms241310640 (PMC10341534; doi:10.3390/ijms241310640)
Supplement: Supplementary file 1 [file ijms-24-10640-s001.zip › Table S4. Primer sequences used in this study.xlsx]

## Sheet: Sheet1
Table S4. Primer sequences used in this study.
Serial number	Gene	Primer Sequences (5’-3’)
1	Actin	F: TTCCTGCTGGTCTTCCTCTATG
		R: TCACGCCAATCCTACTAACCA
2	GUS	F: TGTATGTAGTGACCCGAACCCG
		R: TCAGGCACGCAGGAAACG
3	OsSUT3	F: GAGGTGGCGAACCCAAAGT
		R: GATGTCCGATGCGAAGTGATT
4	Os01g0919400	F: CGCAGGCTGTTCGTCAT
		R: AGTCGGTCGGTGGGATC
5	Os04g0140666	F: CAATGACCCGAAGGAAA
		R: AAGAAACCGAAGGTAGGC
6	Os04g0409200	F: GAGTTATCCCACCACCAGG
		R: CCATCCGAATCTTTACACG
7	Os06g0133000	F:TTCCTGGAGAAGGTTTGGG
		R:TGAAGTATGGGTTGTTGTTGA
8	Os06g0194900	F: CATAACCACAAGGGCACG
		R: ATCAGGGTATCCCAACAC
9	Os06g0675700	F: CAGCCTCTACGACTTCTCCC
		R: CCATGAGCACCACCTTGC
10	Os08g0114200	F: TGAGGCAGGCAGCAATG
		R: GGCCGAACTTGACGTTGT
11	Os10g0347000	F: ACCCAGCAAGCAAGAGC
		R: TGAGCGACCGATACACG
12	Os01g0946500	F: AGTCCAATGGTATCGGTGCT
		R: TGTCCCTGTAGGCGAAGTAG
13	Os02g0733300	F: CCCCTGCTACTGCGACTTCTC
		R: GCACCACCTCGTTCTTCTTGAT
14	Os02g0744700	F: TGATACCAAGATACGGAGAAT
		R: ACGACCCTGATGAGCAAT
15	Os02g0771700	F: CGCCAAAGATGGGCAAGT
		R: GCACAGCACCACAGGTAAAGA
